# Supplementary material for: Oral Bacteria, Virus and Fungi in Saliva and Tissue Samples from Adult Subjects with Oral Squamous Cell Carcinoma: An Umbrella Review
Source: MDPI journal article supplement (doi:10.3390/cancers15235540), 2023-11-22
Supplement: s1 [file s1]

## Supplementary file 1 (S1) - Oral Bacteria, Virus and Fungi in Saliva from Adult Subjects with Oral Squamous Cell Carcinoma

**Table S1.** Data extracted and collected from the included studies that had carried out a histopathologic analysis of OSCC-tissue lesions. Studies: first Author, year and journal of publication, reference, number and design of included studies, meta-analysis, assessed quality, funding (if any). Population characteristics: sample size, mean age, gender ratio, country of origin of the sample, risk factor and history of OPMD, history of malignancies, other comorbidities and ongoing treatments. OSCC characteristics: macroscopic features, location, staging and grading, microscopic features, first diagnosis (primary site/metastatic lesion), time to onset, chemotherapy (yes/no), radiotherapy (yes/no). Intervention: number of sample(s), method(s) of sample collection, microorganisms identification technique, target. Outcome(s): type(s) of phylum, genus and species of bacterium, type(s) and genotype of virus, type(s) and species of fungus detected, number or percentage of OSCC positive case.

| STUDIES                       | POPULATION                                                                                        |                                                   | INTERVENTION                                                | OUTCOME(S)                                      |                                             |                                              |
|-------------------------------|---------------------------------------------------------------------------------------------------|---------------------------------------------------|-------------------------------------------------------------|-------------------------------------------------|---------------------------------------------|----------------------------------------------|
|                               | Characteristics                                                                                   | OSCC                                              |                                                             | Bacteria                                        | Viruses                                     | Fungi                                        |
| First Author, year            | Sample size: n. ...of case/n. ...<br>of control                                                   | Macroscopic features:                             | Sample(s):                                                  |                                                 |                                             |                                              |
| <i>Journal of publication</i> | Mean age: ... y.o.; range ...-...                                                                 | Location:                                         |                                                             |                                                 |                                             |                                              |
|                               | Gender ratio: M/F                                                                                 |                                                   |                                                             |                                                 |                                             |                                              |
| Reference                     | Country: (origin of the sampling)                                                                 | Staging:<br>Grading:                              | Method(s) of sample collection:                             | Type(s) of bacterium: n. .../ %<br>of OSCC case | Type(s) of virus: n. .../ %<br>of OSCC case | Type(s) of fungus: n. .../ %<br>of OSCC case |
| Studies: n.                   |                                                                                                   | Microscopic features:                             |                                                             | Type(s) of bacterium species detected:          |                                             |                                              |
| Type n.                       | Risk factors for OSCC:                                                                            |                                                   | Microorganisms identification technique:                    |                                                 | Genotype(s) of virus detected:              | Type(s) of fungi species detected:           |
|                               | History of OPMD:                                                                                  | First Diagnosis (metastatic lesion/primary site): |                                                             |                                                 |                                             |                                              |
| Meta-analysis                 | Time to OPMD onset:                                                                               | Time to onset:                                    | Target:                                                     |                                                 |                                             |                                              |
|                               | Previous history of malignancies:                                                                 | Chemotherapy:                                     |                                                             |                                                 |                                             |                                              |
| Assessed quality              | Other comorbidities:                                                                              | Radiotherapy:                                     |                                                             |                                                 |                                             |                                              |
| Funding (if any)              | Other ongoing treatments:                                                                         |                                                   |                                                             |                                                 |                                             |                                              |
| Ayuningtyas, 2022             | Sample size: n.136+MD of case/n.92+MD of the healthy control group/n.107+MD of OPMD control group | Macroscopic features: MD<br>Location: MD          | Sample(s): n.136+MD                                         |                                                 |                                             | Than the healthy control group               |
| <i>Pathophysiology</i>        | Mean age: MD                                                                                      | Staging: MD<br>Grading: MD                        | Method(s) of sample collection:<br>Biopsy n.61<br>Swab n.50 | -                                               | -                                           | ↑ Candida: n.MD of OSCC case                 |
| Studies: n.5                  | Gender ratio: MD                                                                                  | Microscopic features: MD                          |                                                             |                                                 |                                             |                                              |
| RCSS n.2                      | Country:                                                                                          |                                                   | Biopsy and Swab n.25+MD                                     |                                                 |                                             | Than the OPMD control group                  |
| CSS n.2                       | India n.80                                                                                        | First Diagnosis: MD                               |                                                             |                                                 |                                             |                                              |
| PS n.1                        | Egypt n.31                                                                                        | Time to onset: MD                                 |                                                             |                                                 |                                             |                                              |

|                                                              |                                                                                                                                                                                  |                                                                                                                                                                                    |                                                                                                                                         |                                                                                                                                                                                                                                                                             |
|--------------------------------------------------------------|----------------------------------------------------------------------------------------------------------------------------------------------------------------------------------|------------------------------------------------------------------------------------------------------------------------------------------------------------------------------------|-----------------------------------------------------------------------------------------------------------------------------------------|-----------------------------------------------------------------------------------------------------------------------------------------------------------------------------------------------------------------------------------------------------------------------------|
| No Meta-analysis                                             | Argentina n.25<br>Taiwan n.MD                                                                                                                                                    | Chemotherapy: MD<br>Radiotherapy: MD                                                                                                                                               | Microorganisms<br>identification technique:<br>Culture n.136+MD<br>IHC: n.MD                                                            | ↑ Candida: n.MD<br>of OSCC case                                                                                                                                                                                                                                             |
| Critically Low<br>quality                                    | Risk factors for OSCC: MD<br>History of OPMD: MD<br>Time to OPMD onset: MD                                                                                                       |                                                                                                                                                                                    | Target: MD                                                                                                                              | Type(s) of fungi<br>species detected:<br>MD                                                                                                                                                                                                                                 |
| No Funding                                                   | Previous history of<br>malignancies: MD<br>Other comorbidities: MD<br>Other ongoing treatments: MD                                                                               |                                                                                                                                                                                    |                                                                                                                                         |                                                                                                                                                                                                                                                                             |
|                                                              | Sample size: n.294 of case<br>Mean age: MD<br>Gender ratio: MD                                                                                                                   |                                                                                                                                                                                    |                                                                                                                                         | Than the healthy control<br>group                                                                                                                                                                                                                                           |
| Bronzato D.J.,<br>2020                                       | Country:<br>USA n.52<br>China n.40                                                                                                                                               | Macroscopic features: MD<br>Location:<br>N/D oral cavity n.161;<br>gingiva n. MD;<br>tongue n. MD;<br>cheek n. MD;<br>oral floor n. MD;<br>mandible n. MD;<br>buccal mucosa n. MD. | Sample(s): n.294<br>Method(s) of sample<br>collection:<br>Biopsy n.125<br>Swab n.146<br>Biopsy and Swab n.20<br>Sterile paper point n.3 | Fusobacteria:<br>↑ Fusobacterium: n.132 of<br>OSCC case<br>Type(s) of Fusobacterium<br>species detected:<br>F. nucleatum;<br>F. naviforme;<br>F. periodonticum;<br>F. canifelinum;<br>F. oral taxon (A71, 203, 370);<br>F. necrophorum;<br>F. gonidiaformans;<br>F. simiae. |
| Arch Oral Biol                                               | India n.40<br>Germany n.33<br>Hungary n.31<br>Wales n.30<br>Sri Lanka n.27<br>Japan n.21<br>Yemen n.N/D                                                                          |                                                                                                                                                                                    |                                                                                                                                         | –                                                                                                                                                                                                                                                                           |
| Studies: n. 13<br>CCS n.13                                   | Saudi Arabia n.N/D                                                                                                                                                               | Staging: MD<br>Grading: MD<br>Microscopic features: MD                                                                                                                             | Microorganisms<br>identification technique:<br>Culture n.142<br>PCR n.152                                                               | –                                                                                                                                                                                                                                                                           |
| Meta-analysis                                                |                                                                                                                                                                                  |                                                                                                                                                                                    |                                                                                                                                         |                                                                                                                                                                                                                                                                             |
| Moderate quality                                             | Risk factors for OSCC: MD<br>History of OPMD: MD<br>Time to OPMD onset: MD<br>Previous history of<br>malignancies: MD<br>Other comorbidities: MD<br>Other ongoing treatments: MD | First Diagnosis: MD<br>Time to onset: MD<br>Chemotherapy: MD<br>Radiotherapy: MD                                                                                                   | Target:<br>16S rDNA n.42<br>16S rRNA n.107<br>MD n.145                                                                                  | Type(s) of Fusobacterium<br>nucleatum subspecies:<br>F. nucleatum ssp. nucleatum;<br>F. nucleatum ssp. vicentii;<br>F. nucleatum ssp.<br>polymorphum;<br>F. nucleatum ssp. animalis.                                                                                        |
| This study was<br>supported by<br>CAPES, FAPESP<br>and CNPq. |                                                                                                                                                                                  |                                                                                                                                                                                    |                                                                                                                                         |                                                                                                                                                                                                                                                                             |
| Chaitanya N.C.,<br>2016                                      | Sample size: n. N/D of case/n.<br>3212 of the healthy control<br>group                                                                                                           | Macroscopic features: MD<br>Location:<br>tongue n. MD<br>buccal mucosa n. MD<br>dentoalveolar complex n.<br>MD                                                                     | Sample(s): n. N/D<br>Method(s) of sample<br>collection:<br>Serum analysis n. MD<br>Biopsy n. MD                                         | Than the healthy control<br>group<br>–<br>↑ HPV: n.N/D of OSCC<br>case                                                                                                                                                                                                      |
| J Cancer Res Ther                                            | Mean age: MD<br>Gender ratio: MD<br>Country: MD                                                                                                                                  |                                                                                                                                                                                    |                                                                                                                                         | –                                                                                                                                                                                                                                                                           |
| Studies: n. 11                                               |                                                                                                                                                                                  |                                                                                                                                                                                    |                                                                                                                                         |                                                                                                                                                                                                                                                                             |

|                                |                                                 |                                      |                                                       |                                                                                                                                                                                                 |   |
|--------------------------------|-------------------------------------------------|--------------------------------------|-------------------------------------------------------|-------------------------------------------------------------------------------------------------------------------------------------------------------------------------------------------------|---|
| CCS n.11                       |                                                 | oral floor n. MD                     | Brush n. MD                                           | 20.34% OSCC of the tongue                                                                                                                                                                       |   |
| Meta-analysis                  | Risk factors for OSCC: MD                       |                                      |                                                       | 8.70% OSCC of the oral floor                                                                                                                                                                    |   |
| Critically Low quality         | History of OPMD: MD                             | Staging: MD                          | Microorganisms identification technique: N/D          | 8.00% OSCC of the dentoalveolar complex                                                                                                                                                         |   |
| No Funding                     | Time to OPMD onset: MD                          | Grading: MD                          |                                                       | 5.00% OSCC of the buccal mucosa                                                                                                                                                                 |   |
|                                | Previous history of malignancies: MD            | Microscopic features: MD             |                                                       | Genotype(s) of HPV detected: MD                                                                                                                                                                 |   |
|                                | Other comorbidities: MD                         | First Diagnosis: MD                  | Target: HPV DNA n.MD                                  |                                                                                                                                                                                                 |   |
|                                | Other ongoing treatments: MD                    | Time to onset: MD                    |                                                       |                                                                                                                                                                                                 |   |
|                                |                                                 | Chemotherapy: MD                     |                                                       |                                                                                                                                                                                                 |   |
|                                |                                                 | Radiotherapy: MD                     |                                                       |                                                                                                                                                                                                 |   |
|                                |                                                 |                                      |                                                       |                                                                                                                                                                                                 |   |
| Christianto S., 2022           |                                                 | Macroscopic features: MD             |                                                       |                                                                                                                                                                                                 |   |
| <i>Laryngoscope</i>            | Sample size: n.3065 of case                     | Location: MD                         | Sample(s): n.3065                                     | ↑ HPV: n.672 (prevalence 21.92) of OSCC case                                                                                                                                                    |   |
| Studies: n. 22                 | Mean age: MD                                    |                                      |                                                       | Genotype(s) of HPV detected:                                                                                                                                                                    |   |
| CS n.22                        | Gender ratio: 2155M/720F/190 N/D                | Staging: Stage I (n.134)             | Method(s) of sample collection: MD                    | HPV-16: n.82                                                                                                                                                                                    |   |
| Meta-analysis                  | Country: MD                                     | Stage II (n.173)                     | Microorganisms identification technique: PCR n.1800   | HPV-6, -11, -16, -18, -26, -31, -32, -33, -34, -35, -37, -39, -40, -42, -43, -44, -45, -51, -52, -53, 54, -55, -56, -58, -59, -61, -62, -66, -67, -68, -69, -70, -71, -72, -74, -81, -82: n.N/D | - |
| Critically Low quality         | Risk factors for OSCC: MD                       | Stage III (n.172)                    | IHC n.779                                             |                                                                                                                                                                                                 |   |
| No Funding                     | History of OPMD: MD                             | Stage IV (n.551)                     | ISH n.264                                             |                                                                                                                                                                                                 |   |
|                                | Time to OPMD onset: MD                          | Stage MD (n.2303)                    | PCR/IHC/ISH n.N/D                                     |                                                                                                                                                                                                 |   |
|                                | Previous history of malignancies: MD            | Grading: MD                          |                                                       |                                                                                                                                                                                                 |   |
|                                | Other comorbidities: MD                         | Microscopic features: MD             |                                                       |                                                                                                                                                                                                 |   |
|                                | Other ongoing treatments: MD                    | First Diagnosis: MD                  | Target: MD                                            |                                                                                                                                                                                                 |   |
|                                |                                                 | Time to onset: MD                    |                                                       |                                                                                                                                                                                                 |   |
|                                |                                                 | Chemotherapy: MD                     |                                                       |                                                                                                                                                                                                 |   |
|                                |                                                 | Radiotherapy: MD                     |                                                       |                                                                                                                                                                                                 |   |
|                                |                                                 |                                      |                                                       |                                                                                                                                                                                                 |   |
| de Carvalho Melo, 2021         | Sample size: n.383 of case                      | Macroscopic features: MD             | Sample(s): n.383                                      |                                                                                                                                                                                                 |   |
| <i>Braz J Otorhinolaryngol</i> | Mean age: N/D y.o.; range 19-92 y.o.            | Location: tongue n.9;                | Method(s) of sample collection: Biopsy n.225 MD n.158 | HPV: n.16 of OSCC case                                                                                                                                                                          |   |
| Studies: n.5                   | Gender ratio: 218M/165F                         | dentoalveolar complex n.1; MD n.373. |                                                       | Genotype(s) of HPV detected:                                                                                                                                                                    |   |
| CCS n.5                        | Country: USA n.113                              |                                      |                                                       | HPV-16: n.14 HPV-18: n.2 NS                                                                                                                                                                     | - |
| No Meta-analysis               | Greece n.53                                     | Staging: MD                          | Microorganisms identification technique: N/D          |                                                                                                                                                                                                 |   |
|                                | Chile n.80                                      | Grading: MD                          |                                                       |                                                                                                                                                                                                 |   |
|                                | China n.137                                     | Microscopic features: MD             |                                                       |                                                                                                                                                                                                 |   |
|                                |                                                 | First Diagnosis: MD                  |                                                       |                                                                                                                                                                                                 |   |
|                                | Risk factors for OSCC: Tobacco n.2 of OSCC HPV+ | Time to onset: MD                    | Target:                                               |                                                                                                                                                                                                 |   |

|                                              |                                                                                                                                                                                                                                                                                                                                                   |                                                                                                                                                          |                                                                                                                                                                                                                                                                                                                                                                     |                                                                       |   |
|----------------------------------------------|---------------------------------------------------------------------------------------------------------------------------------------------------------------------------------------------------------------------------------------------------------------------------------------------------------------------------------------------------|----------------------------------------------------------------------------------------------------------------------------------------------------------|---------------------------------------------------------------------------------------------------------------------------------------------------------------------------------------------------------------------------------------------------------------------------------------------------------------------------------------------------------------------|-----------------------------------------------------------------------|---|
| No Funding                                   | Alcohol n.2 of OSCC HPV+<br>History of OPMD: MD<br>Time to OPMD onset: MD<br>Previous history of malignancies: MD<br>Other comorbidities: MD<br>Other ongoing treatments: MD                                                                                                                                                                      | Chemotherapy: MD<br>Radiotherapy: MD                                                                                                                     | E6 mRNA n.MD<br>E7 mRNA n.MD                                                                                                                                                                                                                                                                                                                                        |                                                                       |   |
|                                              | Sample size: n.N/D of case/n.N/D of the healthy control group<br>Mean age: MD<br>Gender ratio: MD<br>Country:<br>Japan n.N/D<br>Taiwan n.N/D<br>India n.N/D<br>China n.N/D<br>South Africa n.N/D<br>Sudan n.N/D<br>Finland n.N/D<br>Italy n.N/D<br>Spain n.N/D<br>Germany n.N/D<br>Hungary n.N/D<br>Czech Republic n.N/D<br>The Netherlands n.N/D | Macroscopic features: MD<br>Location:<br>tongue n.12<br><br>Staging:<br>In situ OSCC (n.7)<br>Stage II (n.12)<br>Grading: MD<br>Microscopic features: MD | Sample(s): n.N/D<br><br>Method(s) of sample collection: MD<br><br>Microorganisms identification technique:<br>PCR: n.940<br>In situ PCR: n.220<br>Nested PCR: n.290<br>RT-PCR: n.59<br>PCR dot blot: n.198<br>Differential PCR: n.60<br>IHC: n.635<br>ISH: n.864<br>Radioactive ISH: n.117<br>DNA sequencing: n.64<br>Single strand conformation polymorphism: n.60 |                                                                       |   |
| de Lima, 2014<br><i>J Bras Patol Med Lab</i> |                                                                                                                                                                                                                                                                                                                                                   |                                                                                                                                                          |                                                                                                                                                                                                                                                                                                                                                                     | ↑ HPV genome: n.555 of OSCC case                                      |   |
| Studies: n.37<br>MD n.37                     |                                                                                                                                                                                                                                                                                                                                                   |                                                                                                                                                          |                                                                                                                                                                                                                                                                                                                                                                     | Genotype(s) of HPV detected:<br>HPV-6, -11, -16, -18, -31, -33: n.N/D | - |
| No Meta-analysis                             |                                                                                                                                                                                                                                                                                                                                                   |                                                                                                                                                          |                                                                                                                                                                                                                                                                                                                                                                     | ↑ EBV: n.236 of OSCC case                                             |   |
| Critically Low                               | Serbia n.N/D<br>USA n.N/D                                                                                                                                                                                                                                                                                                                         | First Diagnosis: MD<br>Time to onset: MD                                                                                                                 |                                                                                                                                                                                                                                                                                                                                                                     |                                                                       |   |
| No Funding                                   | Venezuela n.N/D<br>Brazil n.N/D<br>Argentina n.N/D                                                                                                                                                                                                                                                                                                | Chemotherapy: MD<br>Radiotherapy: MD                                                                                                                     | Target:<br>HPV DNA: n.640<br>p16: n.193<br>p53: n.496<br>p21: n.33<br>pRb: n.112<br>BCL-2: n.43<br>hTERT: n.35<br>C-MYC: n.60<br>EBV genome: n.601                                                                                                                                                                                                                  |                                                                       |   |
|                                              | Risk factors for OSCC:<br>Tobacco and alcohol n.36<br>History of OPMD: MD<br>Time to OPMD onset: MD<br>Previous history of malignancies: MD<br>Other comorbidities: MD                                                                                                                                                                            |                                                                                                                                                          |                                                                                                                                                                                                                                                                                                                                                                     |                                                                       |   |

|                              |  |                                          |  |  |
|------------------------------|--|------------------------------------------|--|--|
| Other ongoing treatments: MD |  |                                          |  |  |
|                              |  | Sample(s): n.2665                        |  |  |
|                              |  | Method(s) of sample collection:          |  |  |
|                              |  | Biopsy n.2530                            |  |  |
|                              |  | Brush n.135                              |  |  |
|                              |  | Microorganisms identification technique: |  |  |
|                              |  | PCR: n.1016                              |  |  |
|                              |  | In situ PCR: n.102                       |  |  |
|                              |  | PCR Southern blot: n.411                 |  |  |
|                              |  | RT-PCR Southern blot: n.40               |  |  |
|                              |  | Real time qPCR: n. 158                   |  |  |
|                              |  | qPCR: n.128                              |  |  |
|                              |  | Real time RT-PCR: n.35                   |  |  |
|                              |  | Nested PCR: n.708                        |  |  |
|                              |  | PCR ELISA: n.79                          |  |  |
|                              |  | IF: n.85                                 |  |  |
|                              |  | IHC: n.721                               |  |  |
|                              |  | ISH: n.179                               |  |  |
|                              |  | RNA ISH: n.668                           |  |  |
|                              |  | Radioactive RNA ISH: n.4                 |  |  |
|                              |  | DNA ISH: n.142                           |  |  |
|                              |  | RNA microarray: n.151                    |  |  |
|                              |  | NASBA: n.9                               |  |  |
|                              |  | Target:                                  |  |  |
|                              |  | EBV: n.471                               |  |  |
|                              |  | EBNA1: n.458                             |  |  |
|                              |  | EBNA2: n.444                             |  |  |
|                              |  | LMP gene: n.33                           |  |  |
|                              |  | LMP1: n.716                              |  |  |
|                              |  | LMP2: n.4                                |  |  |
|                              |  | EBER: n.535                              |  |  |
|                              |  | EBER1: n.295                             |  |  |
|                              |  | BZLF1: n.240                             |  |  |
|                              |  | BNLF1: n.127                             |  |  |

|                               |                                                               |                          |                                                              |                                                                                                                                                                                         |   |
|-------------------------------|---------------------------------------------------------------|--------------------------|--------------------------------------------------------------|-----------------------------------------------------------------------------------------------------------------------------------------------------------------------------------------|---|
|                               |                                                               |                          |                                                              | BNRF1: n.16<br>BNFR1 n.60<br>BMLF1: n.16<br>BHRF1: n.9<br>BARF0: n.10<br>IR-1 region: n.36<br>IR-3 region: n.1<br>71 EBV fragments: n.57<br>BamHI W: n.974<br>BamHI L: n.103<br>MD n.31 |   |
|                               |                                                               |                          | Sample(s): n.199                                             | Than the healthy control group                                                                                                                                                          |   |
|                               |                                                               |                          | Method(s) of sample collection:<br>Biopsy n.104<br>Swab n.95 | ↑ Fusobacteria:<br>↑ Fusobacterium                                                                                                                                                      |   |
|                               | Sample size: n.199 of case/n.201 of the healthy control group |                          |                                                              | Type(s) of Fusobacterium species detected:                                                                                                                                              |   |
| Gopinath, 2019                | Mean age: 60,85 y.o.; range MD                                | Macroscopic features: MD | Microorganisms                                               | F. nucleatum ssp.                                                                                                                                                                       |   |
|                               | Gender ratio: MD                                              |                          | identification technique:                                    | polymorphum                                                                                                                                                                             |   |
|                               | Country:                                                      | Location:                | DNA isolation kit n.30                                       | F. naviforme                                                                                                                                                                            |   |
| <i>Crit Rev Oncol Hematol</i> | United Kingdom n.10                                           | tongue n.39              | Incubation in Proteinase K and DNA purification kit          |                                                                                                                                                                                         |   |
|                               | USA n.64                                                      | MD n.160                 | n.10                                                         | ↑ Spirochaetes                                                                                                                                                                          |   |
| Studies: n.7                  | Yemen n.20                                                    | Staging: MD              | Incubation in Proteinase K and DNA easy kit n.15             | ↑ Proteobacteria:                                                                                                                                                                       |   |
| CCS n.7                       | Sri Lanka n.25                                                | Grading: MD              | Gentra Puregene Tissue kit n.25                              | ↑ Campylobacter                                                                                                                                                                         | - |
|                               | China n.80                                                    | Microscopic features: MD | QIAamp DNA Stool mini kit n.39                               | Type(s) of Campylobacter species detected:                                                                                                                                              |   |
| No Meta-analysis              | Risk factors for OSCC: N/D                                    | First Diagnosis: MD      | QIAamp DNA Mini kit n.80                                     | C. Oral taxon 44                                                                                                                                                                        |   |
| Low quality                   | History of OPMD: MD                                           | Time to onset: MD        | Target:                                                      | ↑ Pseudomonas                                                                                                                                                                           |   |
|                               | Time to OPMD onset: MD                                        | Chemotherapy: MD         | 16s rRNA: n.10                                               | Type(s) of Pseudomonas species detected:                                                                                                                                                |   |
| No Funding                    | Previous history of malignancies: MD                          | Radiotherapy: MD         | V1-V3 region: n.45                                           | ↑ Pseudomonas aeruginosa                                                                                                                                                                |   |
|                               | Other comorbidities: MD                                       |                          | V4-V5 region: n.90                                           | ↑ Ralstonia                                                                                                                                                                             |   |
|                               | Other ongoing treatments: MD                                  |                          | V4 region: n.54                                              | Type(s) of Ralstonia species detected:                                                                                                                                                  |   |
|                               |                                                               |                          |                                                              | Ralstonia insidiosa                                                                                                                                                                     |   |
|                               |                                                               |                          |                                                              | ↑ Bacteroidetes:                                                                                                                                                                        |   |

|           |                                             |                                          |                   |   |                                                                                                                                                                                                                                                                                                                                                                                                                                                                                                                                                                                                                                                                                                                                                                                                                                                              |   |
|-----------|---------------------------------------------|------------------------------------------|-------------------|---|--------------------------------------------------------------------------------------------------------------------------------------------------------------------------------------------------------------------------------------------------------------------------------------------------------------------------------------------------------------------------------------------------------------------------------------------------------------------------------------------------------------------------------------------------------------------------------------------------------------------------------------------------------------------------------------------------------------------------------------------------------------------------------------------------------------------------------------------------------------|---|
|           |                                             |                                          |                   |   | <p>↑ Capnocytophaga</p> <p>↓ Actinobacteria:</p> <p>↑ Corynebacterium</p> <p>↑ Atopobium</p> <p>↑ Actinomyces</p> <p>↑ Rothia</p> <p>↑ Micrococcus</p> <p>↑ Clavibacter michiganensis</p> <p>Type(s) of Clavibacter michiganensis species detected:</p> <p>Clavibacter michiganensis tellarius</p> <p>↓/↑ Firmicutes:</p> <p>↑ Enterococcus</p> <p>↑ Gemella</p> <p>Type(s) of Gemella species detected:</p> <p>Gemella haemolysans</p> <p>Gemella morbillorum</p> <p>↑ Streptococcus</p> <p>Type(s) of Streptococcus species detected:</p> <p>S. salivarius</p> <p>S. oral taxon 058</p> <p>S. gordonii</p> <p>S. parasanguinis</p> <p>↑ Johnsonella</p> <p>Type(s) of Johnsonella species detected:</p> <p>Johnsonella ignava</p> <p>↑ Peptostreptococcus:</p> <p>Type(s) of Peptostreptococcus species detected:</p> <p>Pepetosptreptococcus stomatis</p> |   |
| Guo, 2018 | Sample size: n.1275 of case<br>Mean age: MD | Macroscopic features: MD<br>Location: MD | Sample(s): n.1275 | - | ↑ HPV: n.190 (prevalence 14.9%) of OSCC case                                                                                                                                                                                                                                                                                                                                                                                                                                                                                                                                                                                                                                                                                                                                                                                                                 | - |

|                                                                                             |                                                                                                                                                  |                                                                                  |                                                                                                                                        |                                                                                                            |                                                   |
|---------------------------------------------------------------------------------------------|--------------------------------------------------------------------------------------------------------------------------------------------------|----------------------------------------------------------------------------------|----------------------------------------------------------------------------------------------------------------------------------------|------------------------------------------------------------------------------------------------------------|---------------------------------------------------|
| <i>Front Oncol</i>                                                                          | Gender ratio: MD<br>Country:<br>China n.1275                                                                                                     | Staging: MD<br>Grading: MD<br>Microscopic features: MD                           | Method(s) of sample collection:<br>Biopsy n.1275                                                                                       | p < 0.001                                                                                                  |                                                   |
| Studies: n.11<br>MD n.11                                                                    | Risk factors for OSCC: MD                                                                                                                        |                                                                                  | Microorganisms                                                                                                                         | Genotype(s) of HPV detected:<br>HPV-16: n.190                                                              |                                                   |
| Meta-analysis                                                                               | History of OPMD: MD<br>Time to OPMD onset: MD                                                                                                    | First Diagnosis: MD<br>Time to onset: MD                                         | identification technique:<br>PCR: n.921+N/D                                                                                            |                                                                                                            |                                                   |
| Critically Low                                                                              | Previous history of malignancies: MD                                                                                                             | Chemotherapy: MD<br>Radiotherapy: MD                                             | ISH: n.N/D                                                                                                                             |                                                                                                            |                                                   |
| This study was supported by the National Natural Science Foundation of China (No.81703298). | Other comorbidities: MD<br>Other ongoing treatments: MD                                                                                          |                                                                                  | Target:<br>HPV-16: n.1275                                                                                                              |                                                                                                            |                                                   |
|                                                                                             | Sample size: n.513 of case/n.354 of the healthy control group<br>Mean age: MD<br>Gender ratio: 39M/44F/430MD                                     |                                                                                  | Sample(s): n.513                                                                                                                       |                                                                                                            |                                                   |
| Gupta, 2020                                                                                 | Country:<br>Japan n.58                                                                                                                           | Macroscopic features: MD<br>Location: MD                                         | Method(s) of sample collection:<br>Swab n.58<br>Biopsy n.455                                                                           | ↑ Than the healthy control group (prevalence 31.92%)                                                       |                                                   |
| <i>Clin Oral Investig</i>                                                                   | Sri Lanka n.53<br>India n.60                                                                                                                     |                                                                                  |                                                                                                                                        | Proteobacteria:<br>Helicobacter                                                                            |                                                   |
| Studies: n.7<br>CSS n.7                                                                     | Iran n.83<br>Germany n.191<br>China n.68                                                                                                         | Staging: MD<br>Grading: MD<br>Microscopic features: MD                           | Microorganisms identification technique:<br>PCR: n.128<br>RT-PCR: n.58<br>Culture: n.131<br>Giemsa: n.68<br>IHC: n.274<br>ELISA: n.121 | Type(s) of Helicobacter species detected:<br>↑ Helicobacter pylori: n.165 (prevalence 32.16%) of OSCC case | -                                                 |
| No Meta-analysis                                                                            |                                                                                                                                                  | First Diagnosis: MD<br>Time to onset: MD<br>Chemotherapy: MD<br>Radiotherapy: MD |                                                                                                                                        |                                                                                                            |                                                   |
| Low quality                                                                                 | Risk factors for OSCC:<br>Betel chewers n.44                                                                                                     |                                                                                  |                                                                                                                                        |                                                                                                            |                                                   |
| No Funding                                                                                  | History of OPMD: MD<br>Time to OPMD onset: MD<br>Previous history of malignancies: MD<br>Other comorbidities: MD<br>Other ongoing treatments: MD |                                                                                  | Target: MD                                                                                                                             |                                                                                                            |                                                   |
| Haghshenas, 2022                                                                            | Sample size: n.69 of case/n.57 of the healthy control group<br>Mean age: MD                                                                      | Macroscopic features: MD<br>Location: MD                                         | Sample(s): n.69                                                                                                                        | -                                                                                                          | Than the healthy control group (prevalence 0.00%) |



|                                                                                                      |                                                                                                                    |                                                                                   |                                                                                                   |                                                                       |
|------------------------------------------------------------------------------------------------------|--------------------------------------------------------------------------------------------------------------------|-----------------------------------------------------------------------------------|---------------------------------------------------------------------------------------------------|-----------------------------------------------------------------------|
| <i>Iran J Public Health</i>                                                                          | Gender ratio: MD<br>Country: MD                                                                                    | Staging: MD<br>Grading: MD<br>Microscopic features: MD                            | Method(s) of sample collection:<br>Biopsy n.69                                                    | ↑ HPV: n.20 (prevalence 28.99%) of OSCC case                          |
| Studies: n.2<br>CCS n.2                                                                              | Risk factors for OSCC: MD<br>History of OPMD: MD<br>Time to OPMD onset: MD                                         | First Diagnosis: MD<br>Time to onset: MD                                          | Microorganisms identification technique:<br>N/D                                                   | Genotype(s) of HPV detected:<br>HPV-16: n.5<br>HPV-18: n.2<br>MD n.13 |
| Meta-analysis                                                                                        | Previous history of malignancies: MD                                                                               | Chemotherapy: MD<br>Radiotherapy: MD                                              |                                                                                                   |                                                                       |
| Critically Low                                                                                       | Other comorbidities: MD<br>Other ongoing treatments: MD                                                            |                                                                                   | Target: MD                                                                                        |                                                                       |
| This study was supported by the Mazandaran University of Medical Sciences (IR.MAZUMS.REC.1399.8657). |                                                                                                                    |                                                                                   |                                                                                                   |                                                                       |
| Hobbs, 2006                                                                                          | Sample size: n.1873 of case/n.2437 of the healthy control group<br>Mean age: MD<br>Gender ratio: MD<br>Country: MD | Macroscopic features: MD<br>Location:<br>N/D oral cavity n.1656<br>Tonsil n.217   | Sample(s): n.1873<br><br>Method(s) of sample collection:<br>Biopsy n.322<br>Serum analysis n.1551 | ↑ HPV: n.314 (prevalence 16.76%) of OSCC case                         |
| <i>Clin Otolaryngol</i>                                                                              |                                                                                                                    |                                                                                   |                                                                                                   |                                                                       |
| Studies: n.15<br>MD n.15                                                                             |                                                                                                                    | Staging: MD<br>Grading: MD<br>Microscopic features: MD                            |                                                                                                   | n.219 (13.22%); N/D oral cavity<br>n.95 (43.78%); tonsil              |
| Meta-analysis                                                                                        | Risk factors for OSCC: MD<br>History of OPMD: MD<br>Time to OPMD onset: MD                                         | First Diagnosis: MD<br>Time to onset: MD                                          | Microorganisms identification technique:<br>N/D                                                   | Genotype(s) of HPV detected: N/D                                      |
| Critically Low                                                                                       | Previous history of malignancies: MD                                                                               | Chemotherapy: MD<br>Radiotherapy: MD                                              | Target: N/D                                                                                       |                                                                       |
| No Funding                                                                                           | Other comorbidities: MD<br>Other ongoing treatments: MD                                                            |                                                                                   |                                                                                                   |                                                                       |
| Huybrechts, 2020                                                                                     | Sample size: n.724 of case/n.1188 of the healthy control group<br>Mean age: MD<br>Gender ratio: MD<br>Country: MD  | Macroscopic features: MD<br>Location: MD                                          | Sample(s): n.724                                                                                  | ↑ Bacteroidetes:<br>↑ Capnocytophaga                                  |
| <i>Cancer Epidemiol Biomarkers Prev</i>                                                              |                                                                                                                    |                                                                                   |                                                                                                   |                                                                       |
| Studies: n.13<br>CS n.2<br>CCS n.11                                                                  | Risk factors for OSCC: MD                                                                                          | Staging: MD<br>Grading: MD<br>Microscopic features: MD<br><br>First Diagnosis: MD | Method(s) of sample collection:<br>Biopsy n.724                                                   | ↑ Fusobacteria:<br>↑ Fusobacterium<br><br>Firmicutes:<br>↑ Dialister  |

|                                                                                                                                                                                     |                                                                                                                                                                                                                                                                                                                                                                                          |                                                                                                                                                                                            |                                                                                                                                                        |                                                                                                                                                                                                                                                                                                                                                                                                      |
|-------------------------------------------------------------------------------------------------------------------------------------------------------------------------------------|------------------------------------------------------------------------------------------------------------------------------------------------------------------------------------------------------------------------------------------------------------------------------------------------------------------------------------------------------------------------------------------|--------------------------------------------------------------------------------------------------------------------------------------------------------------------------------------------|--------------------------------------------------------------------------------------------------------------------------------------------------------|------------------------------------------------------------------------------------------------------------------------------------------------------------------------------------------------------------------------------------------------------------------------------------------------------------------------------------------------------------------------------------------------------|
| No Meta-analysis                                                                                                                                                                    | History of OPMD: MD<br>Time to OPMD onset: MD<br>Previous history of malignancies: MD<br>Other comorbidities: MD<br>Other ongoing treatments: MD                                                                                                                                                                                                                                         | Time to onset: MD<br>Chemotherapy: MD<br>Radiotherapy: MD                                                                                                                                  | Microorganisms identification technique: N/D<br><br>Target: MD                                                                                         | ↑ Peptostreptococcus<br>↑ Parvimonas                                                                                                                                                                                                                                                                                                                                                                 |
| Low quality                                                                                                                                                                         |                                                                                                                                                                                                                                                                                                                                                                                          |                                                                                                                                                                                            |                                                                                                                                                        |                                                                                                                                                                                                                                                                                                                                                                                                      |
| This study was supported by the Intramural Research Program of the National Cancer Institute at the National Institutes of Health and by the Research Foundation-Flanders 12h1519N. |                                                                                                                                                                                                                                                                                                                                                                                          |                                                                                                                                                                                            |                                                                                                                                                        |                                                                                                                                                                                                                                                                                                                                                                                                      |
| Kreimer, 2005                                                                                                                                                                       | Sample size: n.2642 of case<br>Mean age: MD<br>Gender ratio: MD<br>Country:<br>United Kingdom n.39<br>Germany n.53<br>Switzerland n.15<br>Italy n.38+N/D<br>Slovenia n.55<br>The Netherlands n.105<br>France n.12<br>Spain n.2+N/D<br>Canada n.53<br>USA n.832<br>Finland n.28+N/D<br>Norway n.N/D<br>Sweden n.N/D<br>North Ireland n.N/D<br>Poland n.N/D<br>India n.473<br>Taiwan n.103 | Macroscopic features: MD<br>Location: MD<br><br>Staging: MD<br>Grading: MD<br>Microscopic features: MD<br>First Diagnosis: MD<br>Time to onset: MD<br>Chemotherapy: MD<br>Radiotherapy: MD | Sample(s): n.2642<br><br>Method(s) of sample collection:<br>Biopsy n.2642<br><br>Microorganisms identification technique: PCR n.2642<br><br>Target: MD | HPV: n.796 (prevalence 23.5%) of OSCC case<br>HPV prevalence in<br>- Europe: 16.0%<br>- North America: 16.1%<br>- Asia: 33.0%<br>- Other: 18.1%<br><br>↓ Than the oropharyngeal SCCs group (prevalence 35.6%) and the laryngeal SCCs group (prevalence 24.0%)<br><br>Genotype(s) of HPV detected:<br>HPV-6: n.59 (7.41%)<br>HPV-11: n.31 (3.89%)<br>HPV-16: n.423 (53.34%)<br>HPV-18: n.212 (26.73%) |

|                         |                                      |                                 |                                 |                                           |  |                                                                                                                                                                                                                                                                                                |                                                                                                                                                                                                                                                                                                                                                                                                                                                      |
|-------------------------|--------------------------------------|---------------------------------|---------------------------------|-------------------------------------------|--|------------------------------------------------------------------------------------------------------------------------------------------------------------------------------------------------------------------------------------------------------------------------------------------------|------------------------------------------------------------------------------------------------------------------------------------------------------------------------------------------------------------------------------------------------------------------------------------------------------------------------------------------------------------------------------------------------------------------------------------------------------|
|                         |                                      |                                 |                                 |                                           |  | Japan n.306<br>China n.85<br>Korea n.76<br>Venezuela n.50<br>Cuba n.N/D<br>Australia n.N/D<br>Sudan n.N/D<br><br>Risk factors for OSCC: MD<br>History of OPMD: MD<br>Time to OPMD onset: MD<br>Previous history of malignancies: MD<br>Other comorbidities: MD<br>Other ongoing treatments: MD | HPV-16 and -18: n.44 (5.55%)<br>HPV-31: n.3 (0.38%)<br>HPV-32: n.1 (0.13%)<br>HPV-33: n.14 (1.76%)<br>HPV-35: n.1 (0.13%)<br>HPV-39: n.0 (0.0%)<br>HPV-44: n.1 (0.13%)<br>HPV-45: n.0 (0.0%)<br>HPV-51: n.0 (0.0%)<br>HPV-52: n.0 (0.0%)<br>HPV-53: n.1 (0.13%)<br>HPV-56: n.2 (0.25%)<br>HPV-57: n.1 (0.13%)<br>HPV-58: n.1 (0.13%)<br>HPV-59: n.0 (0.0%)<br>HPV-68: n.1 (0.13%)<br>HPV-73: n.0 (0.0%)<br>HPV-81: n.1 (0.13%)<br>HPV-82: n.0 (0.0%) |
|                         |                                      |                                 |                                 |                                           |  |                                                                                                                                                                                                                                                                                                | ↑ Oral yeast: MD n./% of OSCC case                                                                                                                                                                                                                                                                                                                                                                                                                   |
| Mallika, 2020           | Sample size: MD                      | Macroscopic features: MD        | Sample(s): MD                   |                                           |  |                                                                                                                                                                                                                                                                                                |                                                                                                                                                                                                                                                                                                                                                                                                                                                      |
|                         | Mean age: MD                         | Location: MD                    | Method(s) of sample collection: |                                           |  | ↑ HPV: MD n./% of OSCC case                                                                                                                                                                                                                                                                    |                                                                                                                                                                                                                                                                                                                                                                                                                                                      |
| <i>Trans Cancer Res</i> | Gender ratio: MD                     | Staging: MD                     | Biopsy n.MD                     | Proteobacteria:                           |  |                                                                                                                                                                                                                                                                                                | Candida: MD n./% of OSCC case                                                                                                                                                                                                                                                                                                                                                                                                                        |
|                         | Country: MD                          | Grading: MD                     | Swab n.MD                       | Helicobacter                              |  | Genotype(s) of HPV detected:                                                                                                                                                                                                                                                                   | case (two studies of OSCC patients undergoing radiotherapy; one study of OSCC patients undergoing chemotherapy)                                                                                                                                                                                                                                                                                                                                      |
| Studies: n.8            |                                      | Microscopic features: MD        | Brush n.MD                      | Type(s) of Helicobacter species detected: |  | HPV-16 n.MD                                                                                                                                                                                                                                                                                    |                                                                                                                                                                                                                                                                                                                                                                                                                                                      |
| CCS n.8                 | Risk factors for OSCC: MD            |                                 |                                 | ↑ Helicobacter pylori                     |  | HPV-18 n.MD                                                                                                                                                                                                                                                                                    |                                                                                                                                                                                                                                                                                                                                                                                                                                                      |
|                         | History of OPMD: MD                  | First Diagnosis: MD             | Microorganisms                  |                                           |  |                                                                                                                                                                                                                                                                                                |                                                                                                                                                                                                                                                                                                                                                                                                                                                      |
| No Meta-analysis        | Time to OPMD onset: MD               | Time to onset: MD               | identification technique:       |                                           |  | HHV-6: NS                                                                                                                                                                                                                                                                                      |                                                                                                                                                                                                                                                                                                                                                                                                                                                      |
|                         | Previous history of malignancies: MD | Chemotherapy: yes (one study)   | Culture n.MD                    |                                           |  |                                                                                                                                                                                                                                                                                                |                                                                                                                                                                                                                                                                                                                                                                                                                                                      |
| Moderate quality        | Other comorbidities: MD              | Radiotherapy: yes (two studies) | IHC n.MD                        |                                           |  | EBV: NS                                                                                                                                                                                                                                                                                        |                                                                                                                                                                                                                                                                                                                                                                                                                                                      |
|                         | Other ongoing treatments: MD         |                                 | ISH n.MD                        |                                           |  |                                                                                                                                                                                                                                                                                                |                                                                                                                                                                                                                                                                                                                                                                                                                                                      |
| No Funding              |                                      |                                 | PCR n.MD                        |                                           |  |                                                                                                                                                                                                                                                                                                |                                                                                                                                                                                                                                                                                                                                                                                                                                                      |
|                         |                                      |                                 | Target: MD                      |                                           |  |                                                                                                                                                                                                                                                                                                | Type(s) of fungi species detected: MD                                                                                                                                                                                                                                                                                                                                                                                                                |

|                                                        |                                                                                                                                 |                                                        |                                                                                                                                             |                                              |                                                                                                                                                                                                                                                                                                                                                                                |   |
|--------------------------------------------------------|---------------------------------------------------------------------------------------------------------------------------------|--------------------------------------------------------|---------------------------------------------------------------------------------------------------------------------------------------------|----------------------------------------------|--------------------------------------------------------------------------------------------------------------------------------------------------------------------------------------------------------------------------------------------------------------------------------------------------------------------------------------------------------------------------------|---|
|                                                        |                                                                                                                                 |                                                        |                                                                                                                                             |                                              | ↑ HPV: n.627 (prevalence 46.5%) of OSCC case<br>p < 0.001                                                                                                                                                                                                                                                                                                                      |   |
|                                                        |                                                                                                                                 |                                                        |                                                                                                                                             |                                              | Genotype(s) of HPV detected:<br>HPV-2: n.3<br>HPV-3: n.1<br>HPV-4: n.2<br>HPV-6: n.52<br>HPV-10: n.16<br>HPV-11: n.37<br>HPV-13: n.1<br>HPV-16: n.285<br>HPV-18: n.115<br>HPV-31: n.3<br>HPV-33: n.9<br>HPV-57: n.1<br>HPV-6 and -11: n.27<br>HPV-16 and -18: n.49<br>HPV-6, and 11 and 16 and 18: n.1<br>HPV-6 and -16 and -18: n.3<br>HPV-31 and -33 and -35: n.6<br>N/D: 16 |   |
| Miller, 2001                                           | Sample(s): n.N/D                                                                                                                |                                                        |                                                                                                                                             |                                              |                                                                                                                                                                                                                                                                                                                                                                                |   |
| Oral Surg Oral<br>Med Oral Pathol<br>Oral Radiol Endod | Sample size: n.N/D of case<br>Mean age: MD<br>Gender ratio: MD<br>Country: MD                                                   | Macroscopic features: MD<br>Location: MD               | Method(s) of sample collection:<br>Biopsy n.N/D                                                                                             |                                              |                                                                                                                                                                                                                                                                                                                                                                                |   |
| Studies: n.80<br>MD n.80                               | Risk factors for OSCC: MD<br>History of OPMD: MD                                                                                | Staging: MD<br>Grading: MD<br>Microscopic features: MD | Microorganisms identification technique:<br>N/D ISH/IP/IF n.608<br>N/D Southern blot/dot blot/filter blot hybridization n.321<br>PCR n.1154 | -                                            |                                                                                                                                                                                                                                                                                                                                                                                | - |
| Meta-analysis                                          | Time to OPMD onset: MD<br>Previous history of malignancies: MD                                                                  | First Diagnosis: MD<br>Time to onset: MD               |                                                                                                                                             |                                              |                                                                                                                                                                                                                                                                                                                                                                                |   |
| Critically Low quality                                 | Other comorbidities: MD<br>Other ongoing treatments: MD                                                                         | Chemotherapy: MD<br>Radiotherapy: MD                   |                                                                                                                                             |                                              |                                                                                                                                                                                                                                                                                                                                                                                |   |
| No Funding                                             | Target:<br>HPV DNA: n.2083                                                                                                      |                                                        |                                                                                                                                             |                                              |                                                                                                                                                                                                                                                                                                                                                                                |   |
|                                                        |                                                                                                                                 |                                                        |                                                                                                                                             |                                              | LR-HPV: p < 0.001<br>HR-HPV: P < 0.001 (prevalence 23.71%)                                                                                                                                                                                                                                                                                                                     |   |
| Muthusamy, 2023                                        | Sample size: n.373 of case/n.326 of healthy control group/n.73 of OPMD group<br>Mean age: MD<br>Gender ratio: MD<br>Country: MD | Macroscopic features: MD<br>Location: MD               | Sample(s): n.373                                                                                                                            | Fusobacteria:<br>↑ Fusobacterium<br>p = 0.05 | ↑ EBV: MD n./% of OSCC case<br>p < 0.0001                                                                                                                                                                                                                                                                                                                                      |   |
| Cureus                                                 |                                                                                                                                 | Staging: MD<br>Grading: MD<br>Microscopic features: MD | Method(s) of sample collection:<br>Blood analysis n.50<br>Biopsy n.211<br>Biofilm sampling n.21<br>Brush n.91                               | Firmicutes:<br>↑ Streptococcus<br>p = NSS    | HSV-1: MD n./% of OSCC case<br>p = NSS                                                                                                                                                                                                                                                                                                                                         | - |
| Studies: n.6<br>CCS n.6                                |                                                                                                                                 |                                                        |                                                                                                                                             |                                              |                                                                                                                                                                                                                                                                                                                                                                                |   |
| Meta-analysis                                          | Risk factors for OSCC: MD                                                                                                       | First Diagnosis: MD                                    |                                                                                                                                             |                                              |                                                                                                                                                                                                                                                                                                                                                                                |   |

|                                                                                                                                             |                                                                                                                                                  |                                                                                                                             |                                                                                                                                                                                       |                                                                                                                       |                                                    |
|---------------------------------------------------------------------------------------------------------------------------------------------|--------------------------------------------------------------------------------------------------------------------------------------------------|-----------------------------------------------------------------------------------------------------------------------------|---------------------------------------------------------------------------------------------------------------------------------------------------------------------------------------|-----------------------------------------------------------------------------------------------------------------------|----------------------------------------------------|
| Critically Low quality                                                                                                                      | History of OPMD: MD<br>Time to OPMD onset: MD<br>Previous history of malignancies: MD<br>Other comorbidities: MD<br>Other ongoing treatments: MD | Time to onset: MD<br>Chemotherapy: MD<br>Radiotherapy: MD                                                                   | Microorganisms identification technique:<br>PAP technique n.50<br>Culture n.21<br>Nested PCR n.120<br>ELISA n.132<br>PCR n.50<br><br>Target:<br>Herpes Select-1 n.132<br>16s RNA n.50 | Bacteroidetes:<br>↑ Prevotella<br>p = NSS<br>↑ Porphyromonas<br>p = NSS<br><br>Proteobacteria:<br>↑ Neisseria: p= NSS |                                                    |
| This study was supported by Indian Council of Medical Research (ICMR) under Nurturing Clinical Scientist (NCS) scheme HRD/Head-NCS-2019-02. |                                                                                                                                                  |                                                                                                                             |                                                                                                                                                                                       |                                                                                                                       |                                                    |
| Nandi, 2021                                                                                                                                 | Sample size: n.1639 of case/n.206 of the healthy control group                                                                                   | Macroscopic features: MD                                                                                                    | Sample(s): n.1639                                                                                                                                                                     |                                                                                                                       |                                                    |
| <i>Cancer Treat Res Commun</i>                                                                                                              | Mean age: N/D y.o.; range MD<br>Gender ratio: 955M/377F/307MD                                                                                    | Location: tongue n.156<br>MD n.1483                                                                                         | Method(s) of sample collection: N/D                                                                                                                                                   |                                                                                                                       |                                                    |
| Studies: n.19<br>CCS n.19                                                                                                                   | Country: India n.1639                                                                                                                            | Staging: MD<br>Grading: MD                                                                                                  | Microorganisms identification technique:<br>PCR/p16-IHC n.216<br>ISH n.31<br>IHC n.30<br>PCR/ISH n.45<br>PCR n.1317                                                                   | -                                                                                                                     | ↑ HPV: n.553 of OSCC case                          |
| No Meta-analysis                                                                                                                            | Risk factors for OSCC: MD                                                                                                                        | Microscopic features: MD                                                                                                    |                                                                                                                                                                                       |                                                                                                                       | Genotype(s) of HPV detected: MD                    |
| Critically Low quality                                                                                                                      | History of OPMD: MD<br>Time to OPMD onset: MD<br>Previous history of malignancies: MD<br>Other comorbidities: MD<br>Other ongoing treatments: MD | First Diagnosis: MD<br>Time to onset: MD<br>Chemotherapy: MD<br>Radiotherapy: MD                                            | Target: MD                                                                                                                                                                            |                                                                                                                       |                                                    |
| No Funding                                                                                                                                  |                                                                                                                                                  |                                                                                                                             |                                                                                                                                                                                       |                                                                                                                       |                                                    |
| Rahman, 2023                                                                                                                                | Sample size: n.1109 of case/n.211 of the healthy control group/n.150 of the OPMD group                                                           | Macroscopic features: MD                                                                                                    | Sample(s): n.1109                                                                                                                                                                     |                                                                                                                       | HPV-EBV coinfection: n.95 of OSCC case<br>p < 0.01 |
| <i>Mol Oral Microbiol</i>                                                                                                                   | Mean age: MD<br>Gender ratio: MD                                                                                                                 | Location: tonsil n.16<br>oral floor n.30<br>Buccal mucosa n.27<br>tongue n.74<br>palate n.16 (soft n.10/MO n.6)<br>lip n.11 | Method(s) of sample collection: Biopsy n.1109                                                                                                                                         | -                                                                                                                     | HPV: n.31 of OSCC case                             |
| Studies: n.15<br>CCS n.5<br>NRS n.10                                                                                                        | Country: USA n.61<br>Poland n.53                                                                                                                 |                                                                                                                             | Microorganisms identification technique: PCR n.968                                                                                                                                    |                                                                                                                       | Genotype(s) of HPV detected: MD                    |
| Meta-analysis                                                                                                                               |                                                                                                                                                  |                                                                                                                             |                                                                                                                                                                                       |                                                                                                                       |                                                    |

|                                                                                                                                                     |                                                                                                                                                                               |                                                                                  |                                                                                      |                                                                                               |
|-----------------------------------------------------------------------------------------------------------------------------------------------------|-------------------------------------------------------------------------------------------------------------------------------------------------------------------------------|----------------------------------------------------------------------------------|--------------------------------------------------------------------------------------|-----------------------------------------------------------------------------------------------|
| Critically Low                                                                                                                                      | Sweden n.17<br>Norway n.20                                                                                                                                                    | MD n.935                                                                         | ISH n.141                                                                            |                                                                                               |
| No Funding                                                                                                                                          | United Kingdom n.20<br>Sudan n.20<br>India n.20<br>Sri Lanka n.20<br>Yemen n.18                                                                                               | Staging: MD<br>Grading: MD<br>Microscopic features: MD                           | Target: MD                                                                           |                                                                                               |
|                                                                                                                                                     | Risk factors for OSCC: MD<br>History of OPMD: MD<br>Time to OPMD onset: MD<br>Previous history of malignancies: MD<br>Other comorbidities: MD<br>Other ongoing treatments: MD | First Diagnosis: MD<br>Time to onset: MD<br>Chemotherapy: MD<br>Radiotherapy: MD |                                                                                      |                                                                                               |
| Ramos, 2020                                                                                                                                         |                                                                                                                                                                               |                                                                                  |                                                                                      | ↑ Firmicutes:<br>↑ Dialister<br>↑ Catonella                                                   |
| Oral Maxillofac Surg                                                                                                                                | Sample size: n.124 of case/n.20 of the healthy control group/n.27 of the control group with oral fibroepithelial polyp                                                        | Macroscopic features: MD                                                         | Sample(s): n.124                                                                     | ↑ Peptostreptococcus<br>↑ Peptococcus<br>↑ Filifactor<br>↑ Parvimonas                         |
| Studies: n.4<br>CCS n.1<br>MD n.3                                                                                                                   | Mean age: MD<br>Gender ratio: N/D<br>Country: MD                                                                                                                              | Location: tongue n.39<br>MD n.85                                                 | Method(s) of sample collection:<br>Biopsy n.64<br>Swab n.40<br>Swab and Biopsy: n.20 | ↓ Bacteroidetes:<br>↑ Capnocytophaga                                                          |
| No Meta-analysis                                                                                                                                    |                                                                                                                                                                               |                                                                                  |                                                                                      |                                                                                               |
| Critically Low quality                                                                                                                              | Risk factors for OSCC:<br>Tobacco: n.N/D<br>Alcohol: n.N/D                                                                                                                    | Staging: MD<br>Grading: MD<br>Microscopic features: MD                           | Microorganisms identification technique:<br>MiSeq n.85<br>Ion torrent n.39           | ↑/↓ Fusobacteria:<br>↑ Fusobacterium                                                          |
| This study was supported by the National Council for Scientific and Technological Development (CNPq) (Project:211309/2013-3) and the Foundation for | History of OPMD: MD<br>Time to OPMD onset: MD<br>Previous history of malignancies: MD<br>Other comorbidities: MD<br>Other ongoing treatments: MD                              | First Diagnosis: MD<br>Time to onset: MD<br>Chemotherapy: MD<br>Radiotherapy: MD | Target:<br>V4 region n.39<br>V1-V3 region n.45<br>V4-V5 region n.40                  | Type(s) of Fusobacterium species detected:<br>↑ F. nucleatum ssp. polymorphum                 |
|                                                                                                                                                     |                                                                                                                                                                               |                                                                                  |                                                                                      | Proteobacteria:<br>↑ Campylobacter<br>Pseudomonas<br>Type(s) of Pseudomonas species detected: |

|                                                                                                                                                                                                                     |                                                                                                                                                                                                                                                                                                                             |                                                                                                                                                                                                                        |                                                                                                                                                                                                                                                                                                                                              |                                                                                                                                                                                                                                                                                                                                                                                                                                                                                         |                                       |
|---------------------------------------------------------------------------------------------------------------------------------------------------------------------------------------------------------------------|-----------------------------------------------------------------------------------------------------------------------------------------------------------------------------------------------------------------------------------------------------------------------------------------------------------------------------|------------------------------------------------------------------------------------------------------------------------------------------------------------------------------------------------------------------------|----------------------------------------------------------------------------------------------------------------------------------------------------------------------------------------------------------------------------------------------------------------------------------------------------------------------------------------------|-----------------------------------------------------------------------------------------------------------------------------------------------------------------------------------------------------------------------------------------------------------------------------------------------------------------------------------------------------------------------------------------------------------------------------------------------------------------------------------------|---------------------------------------|
| Research<br>Financial Support<br>in the State of Rio<br>de Janeiro<br>(FAPERJ) (Project:<br>E26/<br>1033.001/2012).                                                                                                 | ↑ <i>Pseudomonas aeruginosa</i>                                                                                                                                                                                                                                                                                             |                                                                                                                                                                                                                        |                                                                                                                                                                                                                                                                                                                                              |                                                                                                                                                                                                                                                                                                                                                                                                                                                                                         | Actinobacteria:<br>↑ <i>Atopobium</i> |
| Shaikh, 2015<br><i>Cancer Epidemiol</i><br><br>Studies: n.45<br>CSS n.N/D<br>CCS n.N/D<br><br>Meta-analysis<br><br>Low quality<br><br>This study was<br>supported by the<br>Griffith<br>University of<br>Australia. | Sample size: n.4893 of case<br>Mean age: 56.80 y.o.; range 22-<br>94 y.o.<br>Gender ratio: MD<br>Country:<br>India n.1293<br>Pakistan n.48<br>Bangladesh n.34<br>Sri Lanka n.96<br>Malaysia n.109<br>Thailand n.32<br>China n.183<br>Hong Kong n.31<br>Taiwan n.535<br>South Korea n.167<br>Japan n.843<br>Australia n.1522 | Macroscopic features: MD<br>Location:<br>buccal mucosa n.433<br>gingiva n.196<br>tongue n.679<br>oral floor n.96<br>palate n.64 (hard n.1/soft<br>n.5/MD n.59)<br>tonsil n.1587<br>lip n.114<br>N/D oral cavity n.2353 | Sample(s): n.4893<br><br>Method(s) of sample<br>collection:<br>Biopsy n.4893<br><br>Microorganisms<br>identification technique:<br>PCR n.4209<br>Southern blot PCR n.224<br>Slot blot PCR n.15<br>Nested PCR n.27<br>ISH n.102<br>PCR and ISH: n.244<br>RT-PCR and IHC: n.52<br>In situ PCR and ISH n.20<br><br>Target:<br>HPV genome: n.N/D | ↑ HPV: n.1627 of OSCC<br>case<br><br>n.146 (33.72%): buccal<br>mucosa<br>n.59 (30.10%): gingiva<br>n.219 (32.25%): tongue<br>n.29 (30.21%): oral floor<br>n.20 (31.25%): palate<br>n.489 (30.81%): tonsil<br>n.19 (16.67%): lip<br>n.646 (27.45%): N/D oral<br>cavity<br><br>Genotype(s) of virus<br>detected:<br>HPV-6, -8, -11, -16, -18, -<br>22, -31, -32, -33, -35, -38, -<br>39, -44, -45, -51, -52, -53, -<br>54, -58, -59, -61, -66, -67, -<br>68, -69, -70, -75, -76:<br>n.N/D | -                                     |
|                                                                                                                                                                                                                     | Risk factors for OSCC:<br>Tobacco n.171+N/D<br>Tobacco not smoked n.N/D<br>Alcohol n.N/D<br>History of OPMD: MD<br>Time to OPMD onset: MD<br>Previous history of<br>malignancies: MD<br>Other comorbidities: MD<br>Other ongoing treatments: MD                                                                             | Microscopic features: MD<br>First Diagnosis: MD<br>Time to onset: MD<br>Chemotherapy: MD<br>Radiotherapy: MD                                                                                                           |                                                                                                                                                                                                                                                                                                                                              |                                                                                                                                                                                                                                                                                                                                                                                                                                                                                         |                                       |
|                                                                                                                                                                                                                     | Sample size: n.686 of case/n.<br>412 of the healthy control<br>group<br>Mean age: MD                                                                                                                                                                                                                                        | Macroscopic features: MD<br>Location: MD<br><br>Staging: MD                                                                                                                                                            | Sample(s): n.686<br><br>Method(s) of sample<br>collection:                                                                                                                                                                                                                                                                                   | ↑ EBV: n.332 of OSCC<br>case<br>p = 0.002                                                                                                                                                                                                                                                                                                                                                                                                                                               | -                                     |

|                                                                                                                                                                                                             |                                                                                                                                                                                                                                                                                                                                                                           |                                                                                                                                                                                        |                                                                                                                                                                                                                                                          |                                                                                                                                                                                                                                        |
|-------------------------------------------------------------------------------------------------------------------------------------------------------------------------------------------------------------|---------------------------------------------------------------------------------------------------------------------------------------------------------------------------------------------------------------------------------------------------------------------------------------------------------------------------------------------------------------------------|----------------------------------------------------------------------------------------------------------------------------------------------------------------------------------------|----------------------------------------------------------------------------------------------------------------------------------------------------------------------------------------------------------------------------------------------------------|----------------------------------------------------------------------------------------------------------------------------------------------------------------------------------------------------------------------------------------|
| Studies: n.13<br>CCS n.13                                                                                                                                                                                   | Gender ratio: MD<br>Country:<br>South Africa n.138<br>Netherland n.36<br>China n.81<br>India n.103<br>Japan n.186<br>Sweden n.29<br>Egypt n.22<br>Spain n.5<br>Hungary n.65<br>USA n.21                                                                                                                                                                                   | Grading: MD<br>Microscopic features: MD                                                                                                                                                | Biopsy n.686<br>Microorganisms<br>identification technique:<br>PCR n.562<br>Nested PCR n.34<br>ISH n.36<br>IHC n.33<br>RT-qPCR n.21<br>Target:<br>EBV DNA n.218<br>EBV DNA BamHIW n.275<br>EBV DNA EBNA2 n.150<br>EBV RNA EBER1 n.21<br>EBV protein n.22 |                                                                                                                                                                                                                                        |
| Meta-analysis<br>Moderate quality<br>No Funding                                                                                                                                                             | Risk factors for OSCC: MD<br>History of OPMD: MD<br>Time to OPMD onset: MD<br>Previous history of malignancies: MD<br>Other comorbidities: MD<br>Other ongoing treatments: MD                                                                                                                                                                                             |                                                                                                                                                                                        |                                                                                                                                                                                                                                                          |                                                                                                                                                                                                                                        |
| Shen, 2023<br><i>Arch Oral Biol</i><br>Studies: n.2<br>CCS n.2<br>No Meta-analysis<br>High quality<br>This study was supported by the China-Japan Friendship Hospital Research Project<br>Foundation [grant | Sample size: n.25 of case/n.15 of the healthy control group/n.17 of the OPMD control group<br>Mean age: 56.25 y.o.; range MD<br>Gender ratio: MD<br>Country:<br>USA n.16<br>Malaysia n.9<br>Risk factors for OSCC: MD<br>History of OPMD: MD<br>Time to OPMD onset: MD<br>Previous history of malignancies: MD<br>Other comorbidities: MD<br>Other ongoing treatments: MD | Macroscopic features: MD<br>Location: MD<br>Staging: MD<br>Grading: MD<br>Microscopic features: MD<br>First Diagnosis: MD<br>Time to onset: MD<br>Chemotherapy: MD<br>Radiotherapy: MD | Sample(s): n.25<br>Method(s) of sample collection:<br>Swab n.25<br>Microorganisms<br>identification technique:<br>Incubation Proteinase K & DNA easy kit n.16<br>DNA extraction kit n.9<br>Target:<br>16s rRNA n.25<br>V4 region n.16<br>RFLP gene n.9   | Than the healthy and the OPMD control group<br>Fusobacteria:<br>↑ Fusobacterium<br>↑ Proteobacteria:<br>↑ Neisseria<br>↓ Firmicutes:<br>↑ Gemella<br>↑ Granulicatella<br>Actinobacteria:<br>↓ Rothia<br>Than the healthy control group |



|                                        |                                                               |                            |                                                                                                                                                                                    |                                                   |  |
|----------------------------------------|---------------------------------------------------------------|----------------------------|------------------------------------------------------------------------------------------------------------------------------------------------------------------------------------|---------------------------------------------------|--|
| number 2020-1-QN-2].                   |                                                               |                            | ↑ Bacteroidetes<br><br>↓ Firmicutes:<br>↓ Streptococcus<br>↓ Veillonella<br><br>↑/↓ Actinobacteria<br><br>Than the OPMD control group<br><br>↓ Bacteroidetes<br><br>↓ Fusobacteria |                                                   |  |
|                                        |                                                               |                            | Sample(s): n.349                                                                                                                                                                   |                                                   |  |
| Sivakumar, 2020                        | Sample size: n.349 of case/n.205 of the healthy control group | Macroscopic features: MD   | Method(s) of sample collection: Biopsy n.349                                                                                                                                       |                                                   |  |
| <i>Transl Cancer Res</i>               | Mean age: MD<br>Gender ratio: MD<br>Country: MD               | Location: MD               |                                                                                                                                                                                    |                                                   |  |
| Studies: n.7<br>CCS n.7                |                                                               | Staging: MD<br>Grading: MD | Microorganisms identification technique:                                                                                                                                           | Than the healthy control group (prevalence 20.0%) |  |
|                                        | Risk factors for OSCC: MD                                     | Microscopic features: MD   | IHC n.61                                                                                                                                                                           | -                                                 |  |
| Meta-analysis                          | History of OPMD: MD                                           |                            | ISH n.20                                                                                                                                                                           | ↑ EBV: n.161 (prevalence 46.13%) of OSCC case     |  |
|                                        | Time to OPMD onset: MD                                        | First Diagnosis: MD        | PCR n.190                                                                                                                                                                          |                                                   |  |
| Low quality                            | Previous history of malignancies: MD                          | Time to onset: MD          | N/D n.78                                                                                                                                                                           |                                                   |  |
| No Funding                             | Other comorbidities: MD                                       | Chemotherapy: MD           | Target:                                                                                                                                                                            |                                                   |  |
|                                        | Other ongoing treatments: MD                                  | Radiotherapy: MD           | LMP-1 n.61                                                                                                                                                                         |                                                   |  |
|                                        |                                                               |                            | EBV DNA n.60                                                                                                                                                                       |                                                   |  |
|                                        |                                                               |                            | EBNA-2 n.150                                                                                                                                                                       |                                                   |  |
|                                        |                                                               |                            | N/D n.349                                                                                                                                                                          |                                                   |  |
| Su Mun, 2021                           | Sample size: n.280 of case/n.191 of the healthy control group | Macroscopic features: MD   | Sample(s): n.280                                                                                                                                                                   | Than the healthy control group                    |  |
| <i>Int J Environ Res Public Health</i> | Mean age: MD                                                  | Location: MD               |                                                                                                                                                                                    |                                                   |  |
|                                        | Gender ratio: MD                                              | Staging: MD                | Method(s) of sample collection:                                                                                                                                                    | Fusobacteria: -                                   |  |
|                                        | Country:                                                      | Grading: MD                | Biopsy n.280                                                                                                                                                                       | ↑ Fusobacterium                                   |  |
| Studies: n.7                           | Yemen n.20                                                    | Microscopic features: MD   |                                                                                                                                                                                    | Type(s) of Fusobacterium                          |  |
| CCS n.7                                | Sri Lanka n.25                                                | First Diagnosis: MD        |                                                                                                                                                                                    | species detected:                                 |  |
|                                        |                                                               | Time to onset: MD          |                                                                                                                                                                                    |                                                   |  |

|                                                                                              |                                                                                                                                                                                                                               |                                      |                                                                                                                                                                                                                                                                        |                                                                                                                                                                                                                                                                                                                                                                                                                                                                                                                                                                                                                                                                                                                                                                 |
|----------------------------------------------------------------------------------------------|-------------------------------------------------------------------------------------------------------------------------------------------------------------------------------------------------------------------------------|--------------------------------------|------------------------------------------------------------------------------------------------------------------------------------------------------------------------------------------------------------------------------------------------------------------------|-----------------------------------------------------------------------------------------------------------------------------------------------------------------------------------------------------------------------------------------------------------------------------------------------------------------------------------------------------------------------------------------------------------------------------------------------------------------------------------------------------------------------------------------------------------------------------------------------------------------------------------------------------------------------------------------------------------------------------------------------------------------|
| No Meta-analysis                                                                             | China n.135<br>USA n.100                                                                                                                                                                                                      | Chemotherapy: MD<br>Radiotherapy: MD | Microorganisms<br>identification technique:<br>DNA isolation kit n.20<br>Gentra Puregene Tissue kit<br>n.25<br>QIAampFast DNA Stool<br>Mini kit n.61<br>TIANamp Swab DNA kit<br>n.50<br>MD n.124<br><br>Target:<br>V1-V3 region n.45<br>V3-V4 region n.135<br>MD n.100 | ↑ F. oral taxon 204<br>↑ F. parvimonas<br>↑ F. nucleatum<br>↑ F. nucleatum ssp.<br>polymorphum<br>Leptotrichia:<br>Type(s) of Leptotrichia species<br>detected:<br>↓ Leptotrichia oral taxon 225<br><br>Actinobacteria:<br>↑ Mobiluncus<br>↑/↓ Actinomyces<br>↓ Rothia<br>Type(s) of Rothia species<br>detected:<br>↓ Rothia dentocariosa<br>↓ Rothia mucilaginosa<br>↑ Atopobium<br>↓ Propionibacterium<br>Corynebacterium<br>Type(s) of Corynebacterium<br>species detected:<br>↓ Corynebacterium<br>matruchotii<br>↓ Arthrobacter<br>↓ Microbacterium<br><br>Defferibacteraceae:<br>↓ Mucispirillum<br><br>Proteobacteria:<br>↑ Brevundimonas<br>↑ Aeromonas<br>↑ Frateuria<br>↑ Caulobacter<br>↑ Pseudomonas<br>Type(s) of Pseudomonas<br>species detected: |
| High quality                                                                                 | Risk factors for OSCC:<br>Betel nut chewers n.N/D                                                                                                                                                                             |                                      |                                                                                                                                                                                                                                                                        |                                                                                                                                                                                                                                                                                                                                                                                                                                                                                                                                                                                                                                                                                                                                                                 |
| This study was<br>supported by the<br>International<br>Medical<br>University of<br>Malaysia. | Tobacco n.N/D<br>Shammah (smokeless tobacco)<br>n.N/D<br>Alcohol n.N/D<br>History of OPMD: MD<br>Time to OPMD onset: MD<br>Previous history of<br>malignancies: MD<br>Other comorbidities: MD<br>Other ongoing treatments: MD |                                      |                                                                                                                                                                                                                                                                        |                                                                                                                                                                                                                                                                                                                                                                                                                                                                                                                                                                                                                                                                                                                                                                 |

---

↑ *Pseudomonas aeruginosa*  
Aggregatibacter  
Type(s) of Aggregatibacter  
species detected:  
↑ Aggregatibacter segnis  
↑ Campylobacter  
Type(s) of Campylobacter  
species detected:  
↑ *C. concisus*  
↑ *C. rectus*  
↑ Citrobacter  
Type(s) of Citrobacter species  
detected:  
↑ Citrobacter koseri  
↓ Lautropia  
Type(s) of Lautropia species  
detected:  
↓ Lautropia mirabilis  
↓ Sphingomonas

Firmicutes:  
↓/↑ Streptococcus:  
Type(s) of Streptococcus  
species detected:  
↑ *S. dysgalactiae*  
↓ *S. parasanguinis*  
↓ *S. mitis*  
↓ *S. oralis*  
↓ *S. sp oral taxon 423*  
↓ *S. sp oral taxon 070*  
↓ *S. sp oral taxon 431*  
↓ *S. agalactiae*  
↓ Staphylococcus  
Type(s) of Staphylococcus  
species detected:  
↓ Staphylococcus epidermidis  
↑ Peptostreptococcus  
Type(s) of Peptostreptococcus  
species detected:

---

|                           |                                                                            |                                                              |                                                                                           |                                                                                                                                                                                                                                                                                                                                                                                                                                                                                                                                                                                                                                                                                 |
|---------------------------|----------------------------------------------------------------------------|--------------------------------------------------------------|-------------------------------------------------------------------------------------------|---------------------------------------------------------------------------------------------------------------------------------------------------------------------------------------------------------------------------------------------------------------------------------------------------------------------------------------------------------------------------------------------------------------------------------------------------------------------------------------------------------------------------------------------------------------------------------------------------------------------------------------------------------------------------------|
|                           |                                                                            |                                                              |                                                                                           | ↑ Peptostreptococcus stomatis<br>Granulicatella<br>Type(s) of Granulicatella<br>species detected:<br>↓ Granulicatella adicens<br>↓ Granulicatella elegans<br>↓ Paenibacillus<br>↑ Parvimonas<br>Gemella:<br>Type(s) of Gemella species<br>detected:<br>↑ Gemella morbillorum<br><br>Bacteroidetes:<br>↑ Capnocytophaga<br>Type(s) of Capnocytophaga<br>species detected:<br>↑ Capnocytophaga leadbetteri<br>↑ Prevotella<br>Type(s) of Prevotella species<br>detected:<br>↑ Prevotella salivae<br>↑ Prevotella loeschii<br>↑ Prevotella intermedia<br>Porphyromonas<br>Type(s) of Porphyromonas<br>species detected:<br>↑ Porphyromonas cationiae<br>↓ Porphyromonas gingivalis |
| Syrjänen, 2011            | Sample size: n.1885 of case/n.2248 of the healthy control group            | Macroscopic features: MD<br>Location: MD                     | Sample(s): n.1885                                                                         | HPV: n.634 of OSCC case<br>$p < 0.00001$<br><br>Genotype(s) of virus<br>species detected:<br>HPV-16: n.222<br>$p < 0.00001$                                                                                                                                                                                                                                                                                                                                                                                                                                                                                                                                                     |
| Oral Dis                  | Mean age: MD<br>Gender ratio: MD<br>Country: MD                            | Staging: MD<br>Grading: MD                                   | Method(s) of sample collection:<br>Brush n.697<br>Biopsy n.1043<br>Biopsy and Brush n.145 |                                                                                                                                                                                                                                                                                                                                                                                                                                                                                                                                                                                                                                                                                 |
| Studies: n.33<br>CCS n.33 |                                                                            | Microscopic features: MD                                     |                                                                                           |                                                                                                                                                                                                                                                                                                                                                                                                                                                                                                                                                                                                                                                                                 |
| Meta-analysis             | Risk factors for OSCC: MD<br>History of OPMD: MD<br>Time to OPMD onset: MD | First Diagnosis: MD<br>Time to onset: MD<br>Chemotherapy: MD | Microorganisms<br>identification technique:                                               |                                                                                                                                                                                                                                                                                                                                                                                                                                                                                                                                                                                                                                                                                 |

|                          |                                                                                                                                                                               |                                                                                                              |                                                                                 |   |                                                                                                    |
|--------------------------|-------------------------------------------------------------------------------------------------------------------------------------------------------------------------------|--------------------------------------------------------------------------------------------------------------|---------------------------------------------------------------------------------|---|----------------------------------------------------------------------------------------------------|
| Critically Low quality   | Previous history of malignancies: MD<br>Other comorbidities: MD                                                                                                               | Radiotherapy: MD                                                                                             | PCR n.1821<br>ISH n.64                                                          |   |                                                                                                    |
| No Funding               | Other ongoing treatments: MD                                                                                                                                                  |                                                                                                              | Target: MD                                                                      |   |                                                                                                    |
|                          | Sample size: n.3238 of case<br>Mean age: MD<br>Gender ratio: MD<br>Country:<br>Finland n.91<br>USA n.1082<br>Spain n.42<br>Japan n.606<br>Taiwan n.29<br>Brazil n.69          |                                                                                                              | Sample(s): n.3238                                                               |   |                                                                                                    |
| Termine, 2008            | Slovenia n.62<br>South Africa n.271<br>The Netherlands n.35                                                                                                                   | Macroscopic features: MD<br>Location: MD                                                                     | Method(s) of sample collection:<br>Biopsy n.3238                                |   | ↑ HPV: n. 1090 of OSCC case<br>p = 0.000                                                           |
| Studies: n.47<br>MD n.47 | Sudan n.88<br>Hungary n.79<br>Korea n.42                                                                                                                                      | Staging: MD<br>Grading: MD                                                                                   | Microorganisms                                                                  | - | -                                                                                                  |
| Meta-analysis            | Venezuela n.116<br>Greece n.100<br>China n.113<br>Sweden n.134                                                                                                                | Microscopic features: MD<br>First Diagnosis: MD<br>Time to onset: MD<br>Chemotherapy: MD<br>Radiotherapy: MD | identification technique:<br>ISH: n.370<br>PCR: n.2681<br>N/D ISH or PCR: n.187 |   | Genotype(s) of HPV detected:<br>HPV-6, -11, -16, -18, -22, -31, -33, -35, -38, -58, -68, -70: n.MD |
| Critically Low quality   | India n.213<br>Italy n.66                                                                                                                                                     |                                                                                                              | Target: MD                                                                      |   |                                                                                                    |
| No funding               | Risk factors for OSCC: MD<br>History of OPMD: MD<br>Time to OPMD onset: MD<br>Previous history of malignancies: MD<br>Other comorbidities: MD<br>Other ongoing treatments: MD |                                                                                                              |                                                                                 |   |                                                                                                    |
| Yang, 2019               | Sample size: n.758 of case<br>Mean age: MD<br>Gender ratio: MD<br>Country: China n.758                                                                                        | Macroscopic features: MD<br>Location: MD                                                                     | Sample(s): n.758                                                                |   | HPV: n.55/7.2% of OSCC case                                                                        |
| Medicine (Baltimore)     |                                                                                                                                                                               | Staging:<br>Stage I-IV (n.327)                                                                               | Method(s) of sample collection:<br>Biopsy n.758                                 | - | -<br>Type(s) of HPV detected:<br>HPV-18: n.55                                                      |

|                                                                                               |                                                                                                                                                                               |                                                                                                              |                                                                                                                                                   |                                                |  |
|-----------------------------------------------------------------------------------------------|-------------------------------------------------------------------------------------------------------------------------------------------------------------------------------|--------------------------------------------------------------------------------------------------------------|---------------------------------------------------------------------------------------------------------------------------------------------------|------------------------------------------------|--|
| Studies: n.6<br>CSS n.6                                                                       | Risk factors for OSCC: MD<br>History of OPMD: MD<br>Time to OPMD onset: MD                                                                                                    | Stage III-IV (n.333)<br>Stage N/D (n.98)<br>Grading: MD<br>Microscopic features: MD                          | Microorganisms<br>identification technique:<br>PCR n.704<br>ISH n.54                                                                              | p = 0.011                                      |  |
| Meta-analysis                                                                                 | Previous history of malignancies: MD<br>Other comorbidities: MD                                                                                                               | First Diagnosis: MD<br>Time to onset: MD                                                                     | Target:<br>L1 region of HPV-18 gene<br>n.533                                                                                                      |                                                |  |
| Moderate quality                                                                              | Other ongoing treatments: MD                                                                                                                                                  | Chemotherapy: MD<br>Radiotherapy: MD                                                                         |                                                                                                                                                   |                                                |  |
| No Funding                                                                                    |                                                                                                                                                                               |                                                                                                              |                                                                                                                                                   |                                                |  |
|                                                                                               |                                                                                                                                                                               |                                                                                                              |                                                                                                                                                   | Than the healthy control group                 |  |
| Yu, 2023                                                                                      |                                                                                                                                                                               |                                                                                                              |                                                                                                                                                   |                                                |  |
| <i>Heliyon</i>                                                                                |                                                                                                                                                                               |                                                                                                              | Sample(s): n.30                                                                                                                                   | Fusobacteria                                   |  |
| Studies: n.2<br>CCS n.2                                                                       | Sample size: n.30 of case/n.26 of the healthy control group<br>Mean age: 52.3 y.o.; range MD<br>Gender ratio: MD<br>Country: MD                                               | Macroscopic features: MD<br>Location: MD                                                                     | Method(s) of sample collection:<br>Biopsy n.30                                                                                                    | ↑ Fusobacterium:<br>p=0.000                    |  |
| Meta-Analysis                                                                                 |                                                                                                                                                                               | Staging: MD<br>Grading: MD                                                                                   | Microorganisms                                                                                                                                    | ↑ Proteobacteria:<br>↓ Haemophilus<br>p= 0.000 |  |
| Moderate quality                                                                              | Risk factors for OSCC: MD<br>History of OPMD: MD<br>Time to OPMD onset: MD<br>Previous history of malignancies: MD<br>Other comorbidities: MD<br>Other ongoing treatments: MD | Microscopic features: MD<br>First Diagnosis: MD<br>Time to onset: MD<br>Chemotherapy: MD<br>Radiotherapy: MD | identification technique:<br>N/D next-generation sequencing technology n.30                                                                       | – –<br>↓ Actinobacteria:<br>↓ Rothia           |  |
| This study was supported by Grant from Qingdao Medical Talents Training Program [VYQ2020Y02]. |                                                                                                                                                                               |                                                                                                              | Target:<br>V4 region n.10<br>V1-V3 region n.20                                                                                                    | ↓ Firmicutes:<br>↓ Streptococcus<br>p= 0.032   |  |
|                                                                                               |                                                                                                                                                                               |                                                                                                              |                                                                                                                                                   | ↓ Bacteroidetes:<br>↑ Prevotella:<br>NSS       |  |
| Zhu, 2012                                                                                     | Sample size: n.610 of case/n.259 of healthy control group<br>Mean age: MD y.o.; range MD<br>Gender ratio: MD<br>Country:<br>China n.610                                       | Macroscopic features: MD<br>Location: MD<br>Staging: MD<br>Grading: MD<br>Microscopic features: MD           | Sample(s): n.610<br>Method(s) of sample collection: MD<br>Microorganisms<br>identification technique:<br>PCR n.544<br>Dot-blot hybridization n.66 | Than the healthy control group                 |  |
| <i>PLoS One</i>                                                                               |                                                                                                                                                                               |                                                                                                              |                                                                                                                                                   | ↑ HPV: n.354 of OSCC case<br>p < 0.00001       |  |
| Studies: n.18<br>CCS n.18                                                                     |                                                                                                                                                                               |                                                                                                              |                                                                                                                                                   | – –                                            |  |
| Meta-analysis                                                                                 | Risk factors for OSCC: MD<br>History of OPMD: MD                                                                                                                              | First Diagnosis: MD<br>Time to onset: MD                                                                     |                                                                                                                                                   | Type(s) of HPV detected:<br>HPV-16: n.169      |  |

|                           |                                                                   |                                      |            |                          |
|---------------------------|-------------------------------------------------------------------|--------------------------------------|------------|--------------------------|
| Critically Low<br>quality | Time to OPMD onset: MD<br>Previous history of<br>malignancies: MD | Chemotherapy: MD<br>Radiotherapy: MD | Target: MD | p < 0.00001<br>MD: n.185 |
| No Funding                | Other comorbidities: MD<br>Other ongoing treatments: MD           |                                      |            |                          |

Abbreviations: number, "n."; years old, "y.o."; percentage, "%"; greater than, ">"; missing data, "MD"; not defined, "N/D"; not statistically significant, "NSS"; not significant, "NS"; p-value, "p"; male, "M"; female, "F"; case-control study, "CCS"; cohort study, "CS"; cross-sectional study, "CSS"; retrospective cross-sectional study, "RCSS"; prospective study, "PS"; non-randomized study, "NRS"; Oral Squamous Cell Carcinoma, "OSCC"; Oral Potentially Malignant Disorder, "OPMD"; United States of America, "USA"; polymerase chain reaction, "PCR"; real time polymerase chain reaction, "RT-PCR"; quantitative polymerase chain reaction, "qPCR"; immunohistochemistry, "IHC"; in situ hybridization, "ISH"; enzyme-linked immunosorbent assay, "ELISA"; immunofluorescence, "IF"; immunoperoxidase, "IP"; nucleic acid sequence based amplification, "NASBA"; Papanicolaou technique, "PAP technique"; Messenger Ribonucleic Acid, "mRNA"; Ribosomal Ribonucleic Acid, "rRNA"; RiboNucleic Acid, "RNA"; DeoxyriboNucleic Acid, "DNA"; Ribosomal DeoxyriboNucleic Acid, "rDNA"; subspecies, "ssp."; Fusobacterium, "F."; Campylobacter, "C."; Streptococcus, "S."; restriction fragment length polymorphism, "RFLP"; Human Papilloma Virus, "HPV"; Low Risk Human Papilloma Virus, "LR-HPV"; High Risk Human Papilloma Virus, "HR-HPV"; Herpes Simplex Virus, "HSV"; Epstein Barr Virus, "EBV"; Epstein Barr Nuclear Antigen, "EBNA"; Epstein Barr Encoding Region, "EBER"; Latent Membrane Protein, "LMP"; human telomerase reverse transcriptase, "hTERT"; B-cell lymphoma 2, "BCL-2"; Bahm HI N fragment rightward open reading frame, "BNRF"; Bahm HI A fragment rightward open reading frame, "BARF"; Bahm HI H fragment rightward open reading frame, "BHRF"; Bahm HI N fragment leftward open reading frame, "BZLF"; BahmHI M fragment leftward open reading frame, "BMLF"; BahmHI Z fragment leftward open reading frame, "BZLF"; positive, "+"; increased, "↑"; decreased, "↓"; not investigated, "-".
