# Supplementary material for: Oral Bacteria, Virus and Fungi in Saliva and Tissue Samples from Adult Subjects with Oral Squamous Cell Carcinoma: An Umbrella Review
Source: MDPI journal article supplement (doi:10.3390/cancers15235540), 2023-11-22
Supplement: s1 [file s1]

## Supplementary Table n.S3 – Quality assessment of included studies

**Table S3.** Quality assignment of included studies according to AMSTAR-2. First author, year, reference, sixteen AMSTAR-2 items to be evaluated, quality of the study.

| Studies                | Item 1 | Item 2 | Item 3 | Item 4 | Item 5 | Item 6 | Item 7 | Item 8 | Item 9 | Item 10 | Item 11 | Item 12 | Item 13 | Item 14 | Item 15 | Item 16 | Quality        |
|------------------------|--------|--------|--------|--------|--------|--------|--------|--------|--------|---------|---------|---------|---------|---------|---------|---------|----------------|
| Ayuningtyas, 2022      | Y      | N      | Y      | Y      | Y      | N      | N      | PY     | N      | N       | -       | -       | N       | N       | -       | Y       | Critically Low |
| Bronzato, 2020         | Y      | Y      | Y      | PY     | Y      | Y      | Y      | PY     | PY     | N       | Y       | N       | Y       | Y       | Y       | Y       | Moderate       |
| Chaitanya, 2016        | Y      | N      | Y      | PY     | Y      | Y      | N      | N      | N      | N       | Y       | N       | N       | N       | N       | Y       | Critically Low |
| Christianto, 2022      | Y      | Y      | Y      | PY     | N      | N      | N      | PY     | PY     | N       | Y       | N       | N       | N       | N       | Y       | Critically Low |
| de Carvalho Melo, 2021 | Y      | Y      | Y      | PY     | Y      | Y      | Y      | PY     | PY     | N       | -       | -       | N       | Y       | -       | Y       | Low            |
| de Lima, 2014          | Y      | N      | Y      | PY     | N      | N      | N      | PY     | N      | N       | -       | -       | N       | N       | -       | N       | Critically Low |
| de Lima, 2019          | Y      | N      | N      | PY     | Y      | N      | Y      | Y      | N      | N       | Y       | Y       | N       | Y       | N       | N       | Critically Low |
| Gopinath, 2019         | N      | Y      | N      | Y      | Y      | Y      | Y      | Y      | PY     | N       | -       | -       | N       | Y       | -       | Y       | Low            |
| Guo, 2018              | Y      | N      | N      | Y      | Y      | N      | Y      | N      | N      | N       | Y       | Y       | N       | Y       | N       | Y       | Critically Low |
| Gupta, 2020            | Y      | Y      | Y      | Y      | Y      | Y      | N      | Y      | Y      | N       | -       | -       | N       | Y       | -       | Y       | Low            |
| Haghshenas, 2022       | N      | Y      | Y      | Y      | Y      | N      | N      | PY     | Y      | N       | N       | Y       | Y       | Y       | Y       | Y       | Critically Low |
| Hobbs, 2006            | N      | N      | Y      | PY     | Y      | N      | PY     | PY     | N      | N       | Y       | N       | N       | N       | N       | Y       | Critically Low |
| Huybrechts, 2020       | Y      | Y      | Y      | N      | Y      | Y      | Y      | N      | Y      | N       | -       | -       | Y       | Y       | -       | Y       | Low            |
| Kreimer, 2005          | Y      | PY     | Y      | PY     | N      | Y      | N      | Y      | N      | N       | Y       | N       | N       | Y       | N       | N       | Critically Low |

|                              |    |    |   |    |   |   |    |    |    |   |   |   |   |   |   |   |                   |
|------------------------------|----|----|---|----|---|---|----|----|----|---|---|---|---|---|---|---|-------------------|
| Mallika,<br>2020             | Y  | Y  | Y | Y  | N | N | Y  | Y  | Y  | N | - | - | Y | N | - | Y | Moderate          |
| Mauceri,<br>2022             | Y  | PY | Y | Y  | N | Y | Y  | N  | Y  | N | Y | N | N | Y | N | Y | Critically<br>Low |
| Miller,<br>2001              | Y  | N  | N | Y  | N | N | N  | N  | N  | N | Y | N | N | Y | N | N | Critically<br>Low |
| Muthusamy,<br>2023           | N  | PY | Y | PY | N | N | PY | N  | N  | N | Y | N | N | Y | N | Y | Critically<br>Low |
| Nandi,<br>2021               | Y  | PY | Y | N  | N | N | N  | PY | N  | N | - | - | N | Y | - | Y | Critically<br>Low |
| Rahman,<br>2023              | Y  | Y  | Y | PY | N | Y | Y  | Y  | N  | N | Y | N | N | Y | N | Y | Critically<br>Low |
| Ramos,<br>2020               | Y  | Y  | Y | Y  | N | N | N  | Y  | N  | N | - | - | N | N | - | Y | Critically<br>Low |
| Rapado-<br>González,<br>2020 | Y  | Y  | Y | Y  | Y | Y | Y  | Y  | Y  | N | Y | Y | Y | Y | Y | Y | High              |
| Shaikh,<br>2015              | Y  | Y  | Y | PY | N | Y | N  | PY | Y  | N | Y | N | Y | Y | N | Y | Low               |
| She,<br>2017                 | Y  | Y  | Y | PY | Y | Y | Y  | PY | Y  | N | Y | N | Y | Y | Y | Y | Moderate          |
| Shen,<br>2023                | Y  | Y  | Y | Y  | Y | Y | Y  | Y  | PY | N | - | - | Y | Y | - | Y | High              |
| Sivakumar,<br>2020           | Y  | Y  | Y | Y  | Y | N | N  | Y  | Y  | N | Y | Y | Y | Y | N | Y | Low               |
| Su Mun,<br>2021              | Y  | Y  | Y | Y  | Y | Y | Y  | Y  | Y  | N | - | - | Y | Y | - | Y | High              |
| Syrjänen,<br>2011            | Y  | N  | Y | Y  | N | Y | N  | Y  | N  | N | Y | N | N | Y | N | Y | Critically<br>Low |
| Termine,<br>2008             | PY | N  | N | Y  | Y | Y | N  | N  | N  | N | Y | N | N | Y | N | N | Critically<br>Low |
| Yang,<br>2019                | Y  | Y  | Y | Y  | N | Y | Y  | Y  | Y  | N | Y | Y | Y | Y | Y | Y | Moderate          |
| Yu,<br>2023                  | Y  | Y  | Y | PY | N | Y | Y  | PY | Y  | N | Y | N | Y | Y | Y | Y | Moderate          |

|              |   |   |   |   |   |   |   |    |   |   |   |   |   |   |   |   |                   |
|--------------|---|---|---|---|---|---|---|----|---|---|---|---|---|---|---|---|-------------------|
| Zhu,<br>2012 | Y | N | Y | Y | N | Y | Y | PY | N | N | Y | N | N | Y | N | Y | Critically<br>Low |
|--------------|---|---|---|---|---|---|---|----|---|---|---|---|---|---|---|---|-------------------|

Abbreviations: Yes, "Y"; No, "N"; Partial Yes, "PY"; Not valuable, "-"; underlined items are those considered critical by AMSTAR-2.
