# Supplementary material for: Oral Bacteria, Virus and Fungi in Saliva and Tissue Samples from Adult Subjects with Oral Squamous Cell Carcinoma: An Umbrella Review
Source: MDPI journal article supplement (doi:10.3390/cancers15235540), 2023-11-22
Supplement: s1 [file s1]

## Supplementary file 2 (S2) - Oral Bacteria, Virus and Fungi in Saliva from Adult Subjects with Oral Squamous Cell Carcinoma

**Table S2.** Data extracted and collected from the included studies that had carried out saliva testing in OSCC adult subjects. Studies: first Author, year and journal of publication, reference, number and design of included studies, meta-analysis, assessed quality, funding (if any). Population characteristics: sample size, mean age, gender ratio, country of origin of the sample, risk factor and history of OPMD, history of malignancies, other comorbidities and ongoing treatments. OSCC characteristics: macroscopic features, location, staging and grading, microscopic features, first diagnosis (primary site/metastatic lesion), time to onset, chemotherapy (yes/no), radiotherapy (yes/no). Intervention: number of sample(s), method(s) of sample collection, microorganisms identification technique, target. Outcome(s): type(s) of phylum, genus and species of bacterium, type(s) and genotype of virus, type(s) and species of fungus detected, number or percentage of OSCC positive case.

| STUDIES                                                                                                                                                           | POPULATION                                                                                                                                                                                                                                                                                                                                                                                                             |                                                                                                                                                                                                | INTERVENTION                                                                                                                                                                                       | OUTCOME(S) |                                                                                                     |                                                                                                                                                                                        |
|-------------------------------------------------------------------------------------------------------------------------------------------------------------------|------------------------------------------------------------------------------------------------------------------------------------------------------------------------------------------------------------------------------------------------------------------------------------------------------------------------------------------------------------------------------------------------------------------------|------------------------------------------------------------------------------------------------------------------------------------------------------------------------------------------------|----------------------------------------------------------------------------------------------------------------------------------------------------------------------------------------------------|------------|-----------------------------------------------------------------------------------------------------|----------------------------------------------------------------------------------------------------------------------------------------------------------------------------------------|
|                                                                                                                                                                   | Characteristics                                                                                                                                                                                                                                                                                                                                                                                                        | OSCC                                                                                                                                                                                           |                                                                                                                                                                                                    | Bacteria   | Viruses                                                                                             | Fungi                                                                                                                                                                                  |
| Ayuningtyas, 2022<br><br><i>Pathophysiology</i><br><br>Studies: n.4<br>CCS n.1<br>CSS n.3<br><br>No Meta-analysis<br><br>Critically Low quality<br><br>No Funding | Sample size: n.301 of case/n.408 of the healthy control group/n.200 of OPMD control group/n.6 of other malignancy control group<br>Mean age: MD<br>Gender ratio: MD<br>Country:<br>India n.97<br>Australia n.104<br>Finland n.100<br><br>Risk factors for OSCC: MD<br>History of OPMD: MD<br>Time to OPMD onset: MD<br>Previous history of malignancies: MD<br>Other comorbidities: MD<br>Other ongoing treatments: MD | Macroscopic features: MD<br>Location: MD<br><br>Staging: MD<br>Grading: MD<br>Microscopic features: MD<br><br>First Diagnosis: MD<br>Time to onset: MD<br>Chemotherapy: MD<br>Radiotherapy: MD | Sample(s): n.301<br><br>Method(s) of sample collection:<br>Oral rinse n.104<br>Saliva test n.197<br><br>Microorganisms identification technique:<br>Culture n.301<br>RT-PCR n.52<br><br>Target: MD | -          | -                                                                                                   | Than the healthy control group<br><br>↑ Candida: n.MD of OSCC case<br><br>Than the OPMD control group<br><br>↑ Candida: n.MD of OSCC case<br><br>Type(s) of fungi species detected: MD |
| de Lima, 2019<br><br><i>Crit Rev Oncog</i><br><br>Studies: n.1<br>MD n.1                                                                                          | Sample size: n.12 of case/n.47 of the healthy control group/n.12 of the OPMD control group<br>Mean age: MD<br>Gender ratio: MD                                                                                                                                                                                                                                                                                         | Macroscopic features: MD<br>Location: MD<br><br>Staging: MD<br>Grading: MD                                                                                                                     | Sample(s): n.12<br><br>Method(s) of sample collection:<br>Saliva test n.12                                                                                                                         | -          | EBV: n.7 (prevalence 58.3%) of OSCC case<br><br>↑ Than the healthy control group (prevalence 40.4%) | -                                                                                                                                                                                      |

|                                                                                                                                                 |                                                                                                                                                                                                                                                                                                                                              |                                                                                                                                                                                                |                                                                                                                                                                                                                                                                    |                                                                                                                                                                                                                                                                                                                                                                                                                                                                                 |                                                                                        |   |
|-------------------------------------------------------------------------------------------------------------------------------------------------|----------------------------------------------------------------------------------------------------------------------------------------------------------------------------------------------------------------------------------------------------------------------------------------------------------------------------------------------|------------------------------------------------------------------------------------------------------------------------------------------------------------------------------------------------|--------------------------------------------------------------------------------------------------------------------------------------------------------------------------------------------------------------------------------------------------------------------|---------------------------------------------------------------------------------------------------------------------------------------------------------------------------------------------------------------------------------------------------------------------------------------------------------------------------------------------------------------------------------------------------------------------------------------------------------------------------------|----------------------------------------------------------------------------------------|---|
| Meta-analysis<br><br>Critically Low quality<br><br>No Funding                                                                                   | Country: MD<br><br>Risk factors for OSCC: MD<br>History of OPMD: MD<br>Time to OPMD onset: MD<br>Previous history of malignancies: MD<br>Other comorbidities: MD<br>Other ongoing treatments: MD                                                                                                                                             | Microscopic features: MD<br><br>First Diagnosis: MD<br>Time to onset: MD<br>Chemotherapy: MD<br>Radiotherapy: MD                                                                               | Microorganisms identification technique: Nested PCR n.12<br><br>Target: EBV n.12                                                                                                                                                                                   |                                                                                                                                                                                                                                                                                                                                                                                                                                                                                 | and the OPMD control group (prevalence 41.7%)<br><br>Genotype(s) of virus detected: MD |   |
| Gopinath, 2019<br><br><i>Crit Rev Oncol Hematol</i><br><br>Studies: n.2<br>CCS n.2<br><br>No Meta-analysis<br><br>Low quality<br><br>No Funding | Sample size: n.130 of case/n.125 of the healthy group control<br>Mean age: > 50 y.o.; range MD<br>Gender ratio: MD<br>Country: Taiwan n.127<br>USA n.3<br><br>Risk factors for OSCC: N/D<br>History of OPMD: MD<br>Time to OPMD onset: MD<br>Previous history of malignancies: MD<br>Other comorbidities: MD<br>Other ongoing treatments: MD | Macroscopic features: MD<br>Location: MD<br><br>Staging: MD<br>Grading: MD<br>Microscopic features: MD<br><br>First Diagnosis: MD<br>Time to onset: MD<br>Chemotherapy: MD<br>Radiotherapy: MD | Sample(s): n.130<br><br>Method(s) of sample collection: Saliva test n.130<br><br>Microorganisms identification technique: Incubation in Proteinase K and DNA purification kit n.3<br>QIAamp DNA Blood Kit n.127<br><br>Target: V4-V5 region n.3<br>V4 region n.127 | Than the healthy control group<br><br>Bacteroidetes:<br>↑ Bacteroides: > n.50 of OSCC case<br>↑ Porphyromonas<br><br>Proteobacteria:<br>↑ Escherichia: > n.50 of OSCC case<br>Ralstonia<br>Type(s) of Ralstonia species detected :<br>↑ Ralstonia insidiosa<br><br>Actinobacteria:<br>↑ Rothia<br><br>Firmicutes:<br>↑ Bulleidia: > n.50 of OSCC case<br>↑ Gemella<br>↑ Peptostreptococcus<br>↑ Streptococcus<br>↑ Lactobacillus<br>↑ Gemmiger<br>↑ Oscillospira<br>↑ Roseburia | -                                                                                      | - |

|                                                                                                                                                  |                                                                                                                                                                                                                                                                                                                                                    |                                                                                                                                                                                                                               |                                                                                                                                                               |                                                                                                                                                                                                          |   |   |
|--------------------------------------------------------------------------------------------------------------------------------------------------|----------------------------------------------------------------------------------------------------------------------------------------------------------------------------------------------------------------------------------------------------------------------------------------------------------------------------------------------------|-------------------------------------------------------------------------------------------------------------------------------------------------------------------------------------------------------------------------------|---------------------------------------------------------------------------------------------------------------------------------------------------------------|----------------------------------------------------------------------------------------------------------------------------------------------------------------------------------------------------------|---|---|
|                                                                                                                                                  |                                                                                                                                                                                                                                                                                                                                                    |                                                                                                                                                                                                                               |                                                                                                                                                               | Synergistota:<br>↑ Cloacibacillus                                                                                                                                                                        |   |   |
| <p>Gupta, 2020</p> <p><i>Clin Oral Investig</i></p> <p>Studies: n.1<br/>CSS n.1</p> <p>No Meta-analysis</p> <p>Low quality</p> <p>No Funding</p> | <p>Sample size: n.50 of case/n.50 of the healthy control group</p> <p>Mean age: MD</p> <p>Gender ratio: MD</p> <p>Country: India n.50</p> <p>Risk factors for OSCC: MD</p> <p>History of OPMD: MD</p> <p>Time to OPMD onset: MD</p> <p>Previous history of malignancies: MD</p> <p>Other comorbidities: MD</p> <p>Other ongoing treatments: MD</p> | <p>Macroscopic features: MD</p> <p>Location: MD</p> <p>Staging: MD</p> <p>Grading: MD</p> <p>Microscopic features: MD</p> <p>First Diagnosis: MD</p> <p>Time to onset: MD</p> <p>Chemotherapy: MD</p> <p>Radiotherapy: MD</p> | <p>Sample(s): n.50</p> <p>Method(s) of sample collection: Saliva test n.50</p> <p>Microorganisms identification technique: Culture n.50</p> <p>Target: MD</p> | <p>Than the healthy control group (prevalence 8.0%)</p> <p>Proteobacteria: Helicobacter</p> <p>Type(s) of Helicobacter species detected: ↑ Helicobacter pylori: n.32 (prevalence 64.0%) of OSCC case</p> | - | - |
| Huybrechts, 2020                                                                                                                                 | <p>Sample size: n.724 of case/n.1188 of the healthy control group</p>                                                                                                                                                                                                                                                                              | <p>Macroscopic features: MD</p> <p>Location: MD</p>                                                                                                                                                                           | <p>Sample(s): n.724</p>                                                                                                                                       | <p>↑ Bacteroidetes:<br/>↑ Capnocytophaga</p>                                                                                                                                                             | - | - |

|                                                                                                                                                                                                                                                                                                                                   |                                                                                                                                                                                                                                                    |                                                                                                                                                            |                                                                                                                                        |                                                                                                                                                                                            |  |  |
|-----------------------------------------------------------------------------------------------------------------------------------------------------------------------------------------------------------------------------------------------------------------------------------------------------------------------------------|----------------------------------------------------------------------------------------------------------------------------------------------------------------------------------------------------------------------------------------------------|------------------------------------------------------------------------------------------------------------------------------------------------------------|----------------------------------------------------------------------------------------------------------------------------------------|--------------------------------------------------------------------------------------------------------------------------------------------------------------------------------------------|--|--|
| <p><i>Cancer Epidemiol Biomarkers Prev</i></p> <p>Studies: n.16<br/>CS n.2<br/>CCS n.14</p> <p>No Meta-analysis</p> <p>Low quality</p> <p>This study was supported by the Intramural Research Program of the National Cancer Institute at the National Institutes of Health and by the Research Foundation-Flanders 12h1519N.</p> | <p>Mean age: MD<br/>Gender ratio: MD<br/>Country: MD</p> <p>Risk factors for OSCC: MD<br/>History of OPMD: MD<br/>Time to OPMD onset: MD<br/>Previous history of malignancies: MD<br/>Other comorbidities: MD<br/>Other ongoing treatments: MD</p> | <p>Staging: MD<br/>Grading: MD<br/>Microscopic features: MD</p> <p>First Diagnosis: MD<br/>Time to onset: MD<br/>Chemotherapy: MD<br/>Radiotherapy: MD</p> | <p>Method(s) of sample collection:<br/>Saliva test n.724</p> <p>Microorganisms identification technique:<br/>N/D</p> <p>Target: MD</p> | <p>↑ Fusobacteria:<br/>↑ Fusobacterium</p> <p>Actinobacteria:<br/>↑ Actinomyces</p> <p>↓ Firmicutes:<br/>↑ Dialister<br/>↑ Peptostreptococcus<br/>↑ Parvimonas<br/>↑ Streptococcus: NS</p> |  |  |
|-----------------------------------------------------------------------------------------------------------------------------------------------------------------------------------------------------------------------------------------------------------------------------------------------------------------------------------|----------------------------------------------------------------------------------------------------------------------------------------------------------------------------------------------------------------------------------------------------|------------------------------------------------------------------------------------------------------------------------------------------------------------|----------------------------------------------------------------------------------------------------------------------------------------|--------------------------------------------------------------------------------------------------------------------------------------------------------------------------------------------|--|--|

|                                                                                                                                                                           |                                                                                                                                                                                                                                                                                                                                     |                                                                                                                                                                                                |                                                                                                                                                                                                                                                                                                                                                        |                                                                                                                                                                                                                                               |                                                                                                                                                                   |                                                                                                                |
|---------------------------------------------------------------------------------------------------------------------------------------------------------------------------|-------------------------------------------------------------------------------------------------------------------------------------------------------------------------------------------------------------------------------------------------------------------------------------------------------------------------------------|------------------------------------------------------------------------------------------------------------------------------------------------------------------------------------------------|--------------------------------------------------------------------------------------------------------------------------------------------------------------------------------------------------------------------------------------------------------------------------------------------------------------------------------------------------------|-----------------------------------------------------------------------------------------------------------------------------------------------------------------------------------------------------------------------------------------------|-------------------------------------------------------------------------------------------------------------------------------------------------------------------|----------------------------------------------------------------------------------------------------------------|
| Mallika, 2020<br><br><i>Trans Cancer Res</i><br><br>Studies: n.11<br>CCS n.11<br><br>No Meta-analysis<br><br>Moderate quality<br><br>No Funding                           | Sample size: MD<br>Mean age: MD<br>Gender ratio: MD<br>Country: MD<br><br>Risk factors for OSCC: MD<br>History of OPMD: MD<br>Time to OPMD onset: MD<br>Previous history of malignancies: MD<br>Other comorbidities: MD<br>Other ongoing treatments: MD<br>MD                                                                       | Macroscopic features: MD<br>Location: MD<br><br>Staging: MD<br>Grading: MD<br>Microscopic features: MD<br><br>First Diagnosis: MD<br>Time to onset: MD<br>Chemotherapy: MD<br>Radiotherapy: MD | Sample(s): MD<br><br>Method(s) of sample collection:<br>Saliva test n.MD<br>Oral swab n.MD<br><br>Microorganisms identification technique:<br>Culture n.MD<br>VIDAS EBV kit n.MD<br>QIAamp Mini Elute Virus Spin kit Digene HPV genotyping RH test n.MD<br>PCR n.MD<br>Spectrophotometer n.MD<br>Gas chromatography n.MD<br>IHC n.MD<br><br>Target: MD | Proteobacteria:<br>Helicobacter<br>Type(s) of Helicobacter species detected:<br>↑ Helicobacter pylori                                                                                                                                         | HPV: MD n./% of OSCC case<br><br>Genotype(s) of HPV detected:<br>↓ HPV-16 n.MD<br>↓ HPV-18: NS n.MD<br><br>EBV: NS<br><br>Than the healthy control group<br>↑ EBV | Than the healthy control group<br>↑ Candida: MD n./% of OSCC case<br><br>Type(s) of fungi species detected: MD |
| Mauceri, 2022<br><br><i>Cancers (Basel)</i><br><br>Studies: n.11<br>CCS n.8<br>CS n.2<br>CSCS n.1<br><br>No Meta-analysis<br><br>Critically Low quality<br><br>No Funding | Sample size: n.679 of case/n.480 of the healthy control group/n.153 of the OPMD control group/n.15 of the periodontitis control group<br>Mean age: 56,8 y.o.; range 49,7-63,9 y.o.<br>Gender ratio: 179M/113F/387MD<br>Country: Taiwan n.445<br>China n.97<br>USA n.18<br>Sudan n.59<br>Japan n.60<br><br>Risk factors for OSCC: MD | Macroscopic features: MD<br>Location: MD<br><br>Staging: MD<br>Grading: MD<br>Microscopic features: MD<br><br>First Diagnosis: MD<br>Time to onset: MD<br>Chemotherapy: MD<br>Radiotherapy: MD | Sample(s): n.687<br><br>Method(s) of sample collection:<br>Sputum n.448<br>Oral swab n.156<br>Oral rinse n.18<br>Saliva, subgingival plaque, tumor and healthy surface n.57<br><br>Microorganisms identification technique:<br>QIAamp DNA Blood Mini kit n.347<br>QIAamp MinElute Virus Spin kit n.138                                                 | ↑ Spirochaetes:<br>↑ Treponema<br><br>↑ Proteobacteria:<br>↑ Campylobacter<br>↓ Lautropia<br>↓ Haemophilus<br>↑ Eikenella<br><br>↑ Bacteroidetes:<br>↑ Alloprevotella<br>↑ Capnocytophaga<br>↑ Prevotella<br><br>Tenericutes:<br>↑ Mycoplasma | -                                                                                                                                                                 | -                                                                                                              |

|                                                                                                              |                                                                                                                                                                                                 |                                                                                                                                 |                                                                                                                                                                                                                                                                                                        |                                                                                                                                                                                                                                                                                                                                                                                                                                                                                                                                                        |   |   |
|--------------------------------------------------------------------------------------------------------------|-------------------------------------------------------------------------------------------------------------------------------------------------------------------------------------------------|---------------------------------------------------------------------------------------------------------------------------------|--------------------------------------------------------------------------------------------------------------------------------------------------------------------------------------------------------------------------------------------------------------------------------------------------------|--------------------------------------------------------------------------------------------------------------------------------------------------------------------------------------------------------------------------------------------------------------------------------------------------------------------------------------------------------------------------------------------------------------------------------------------------------------------------------------------------------------------------------------------------------|---|---|
|                                                                                                              | History of OPMD: MD<br>Time to OPMD onset: MD<br>Previous history of malignancies: MD<br>Other comorbidities: MD<br>Other ongoing treatments: MD                                                |                                                                                                                                 | QIAamp Fast DNA Stool Mini kit n.10<br>FastDNA kit n.59<br>Gene Prep Star PI-80X device n.60<br>Modified QIAGEN DNA extraction method n.18<br>E.Z.N.A. soil DNA kit n.47<br><br>Target:<br>Fungal ITS2 region n.59<br>V4 region n.280<br>V3-V4 region n.115<br>V3-V5 region n.138<br>V4-V5 region n.87 | ↓ Firmicutes: MD n./% of OSCC case<br>↑ Centipeda<br>↑ Selenomonas<br>↑ Dialister<br>↑ Peptostreptococcus<br>↑ Filifactor<br>↑ Peptococcus<br>↑ Catonella<br>↑ Parvimonas<br>↓ Megasphaera<br>↓ Stomatobaculum<br>↓ Granulicatella<br>↓ Veillonella<br>↓ Streptococcus<br>Type(s) of Streptococcus species detected:<br>↓ Streptococcus pneumoniae<br><br>↑ Fusobacteria:<br>↑ Fusobacterium<br>Type(s) of Fusobacterium species detected:<br>F. nucleatum<br><br>↓ Actinobacteria: : MD n./% of OSCC case<br>↓ Scardovia<br>↓ Rothia<br>↓ Actinomyces |   |   |
| Ramos, 2020<br><br><i>Oral Maxillofac Surg</i><br><br>Studies: n.4<br>CS n.1<br>CSS n.1<br>CCS n.1<br>MD n.1 | Sample size: n.339 of case/n. 214 of the healthy control group/n.124 of the OPMD control group<br>Mean age: MD<br>Gender ratio: N/D<br>Country: MD<br><br>Risk factors for OSCC: Tobacco: n.N/D | Macroscopic features: MD<br>Location: MD<br><br>Staging:<br>Stage I (n.41)<br>Stage II (n.66)<br>Stage IV (n.90)<br>Grading: MD | Sample(s): n.339<br><br>Method(s) of sample collection:<br>Oral rinse n.197<br>Saliva test n.142<br><br>Microorganisms identification technique: MiSeq n.333                                                                                                                                           | Than the healthy control group<br><br>Firmicutes:<br>↑ Streptococcus<br>Type(s) of Streptococcus species detected:<br>↑ S. mitis (in smokers patients)<br>↑ Peptostreptococcus<br>↑ Bacillus                                                                                                                                                                                                                                                                                                                                                           | - | - |

|                                                                                                                                                                                                                                                                                                                   |                                                                                                                                                                                                                                                                      |                                                                                                                                                                                                                               |                                                                                                                                                                                                                                                                         |                                                                                                                                                                                                                                                                                                                                                                                        |                                                                                                                                                                                                                                               |   |
|-------------------------------------------------------------------------------------------------------------------------------------------------------------------------------------------------------------------------------------------------------------------------------------------------------------------|----------------------------------------------------------------------------------------------------------------------------------------------------------------------------------------------------------------------------------------------------------------------|-------------------------------------------------------------------------------------------------------------------------------------------------------------------------------------------------------------------------------|-------------------------------------------------------------------------------------------------------------------------------------------------------------------------------------------------------------------------------------------------------------------------|----------------------------------------------------------------------------------------------------------------------------------------------------------------------------------------------------------------------------------------------------------------------------------------------------------------------------------------------------------------------------------------|-----------------------------------------------------------------------------------------------------------------------------------------------------------------------------------------------------------------------------------------------|---|
| <p>No Meta-analysis</p> <p>Critically Low quality</p> <p>This study was supported by the National Council for Scientific and Technological Development (CNPq) (Project:211309/2013-3) and the Foundation for Research Financial Support in the State of Rio de Janeiro (FAPERJ) (Project: E26/1033.001/2012).</p> | <p>Alcohol: n.N/D</p> <p>Betel quid chewing: n.N/D</p> <p>History of OPMD: MD</p> <p>Time to OPMD onset: MD</p> <p>Previous history of malignancies: MD</p> <p>Other comorbidities: MD</p> <p>Other ongoing treatments: MD</p>                                       | <p>Microscopic features: MD</p> <p>First Diagnosis: MD</p> <p>Time to onset: MD</p> <p>Chemotherapy: MD</p> <p>Radiotherapy: MD</p>                                                                                           | <p>454/GS Junior n.6</p> <p>Target:</p> <p>V4 n.125</p> <p>V3-V4 n.197</p> <p>V3-V5 n.6</p> <p>V4-V5 n.11</p>                                                                                                                                                           | <p>↑ Parvimonas</p> <p>↑ Enterococcus</p> <p>↑ Veillonella</p> <p>↑ Stomatobaculum</p> <p>↑ Lactobacillus (abundance with advanced TNM stage)</p> <p>Bacteroidetes:</p> <p>↑ Prevotella</p> <p>↑ Proteobacteria:</p> <p>↑ Haemophilus</p> <p>Actinobacteria:</p> <p>↑ Slackia</p> <p>↑ Rothia</p> <p>Tenericutes:</p> <p>↑ Mollicutes</p> <p>Spirochaetes:</p> <p>↑ Spirochaetales</p> |                                                                                                                                                                                                                                               |   |
| <p>Rapado-González, 2020</p> <p><i>J Clin Med</i></p> <p>Studies: n.12</p> <p>CCS n.12</p> <p>Meta-analysis</p> <p>High quality</p> <p>No Funding</p>                                                                                                                                                             | <p>Sample size: n.658 of case/n.2210 of the healthy control group</p> <p>Mean age: MD</p> <p>Gender ratio: MD</p> <p>Country:</p> <p>Sweden n.85</p> <p>Iran n.22</p> <p>India n.313</p> <p>USA n.109</p> <p>France n.22</p> <p>Canada n.72</p> <p>Pakistan n.35</p> | <p>Macroscopic features: MD</p> <p>Location: MD</p> <p>Staging: MD</p> <p>Grading: MD</p> <p>Microscopic features: MD</p> <p>First Diagnosis: MD</p> <p>Time to onset: MD</p> <p>Chemotherapy: MD</p> <p>Radiotherapy: MD</p> | <p>Sample(s): n.658</p> <p>Method(s) of sample collection:</p> <p>Oral rinse n.286</p> <p>Saliva test n.372</p> <p>Microorganisms identification technique:</p> <p>PCR: n.385</p> <p>qPCR: n.144</p> <p>Nested PCR: n.44</p> <p>Nested PCR and DNA sequencing: n.85</p> | -                                                                                                                                                                                                                                                                                                                                                                                      | <p>↑ HPV: n.271 of OSCC case</p> <p>p &lt; 0.01</p> <p>Genotype(s) of virus detected:</p> <p>HPV-16: n.57</p> <p>p &lt; 0.02</p> <p>HPV-18: n.24</p> <p>NSS</p> <p>N/D HR-HPV: n.164</p> <p>p &lt; 0.01</p> <p>N/D LR-HPV: n.8</p> <p>NSS</p> | - |

|                                                                                                                                                                                                        |                                                                                                                                                                                                                                                                                                                                   |                                                                                                                                                                                                                               |                                                                                                                                                                                                                                                                                                                       |                                                                                                                                                                       |                                                                                                                   |                                                                                        |
|--------------------------------------------------------------------------------------------------------------------------------------------------------------------------------------------------------|-----------------------------------------------------------------------------------------------------------------------------------------------------------------------------------------------------------------------------------------------------------------------------------------------------------------------------------|-------------------------------------------------------------------------------------------------------------------------------------------------------------------------------------------------------------------------------|-----------------------------------------------------------------------------------------------------------------------------------------------------------------------------------------------------------------------------------------------------------------------------------------------------------------------|-----------------------------------------------------------------------------------------------------------------------------------------------------------------------|-------------------------------------------------------------------------------------------------------------------|----------------------------------------------------------------------------------------|
|                                                                                                                                                                                                        | <p>Risk factors for OSCC: MD</p> <p>History of OPMD: MD</p> <p>Time to OPMD onset: MD</p> <p>Previous history of malignancies: MD</p> <p>Other comorbidities: MD</p> <p>Other ongoing treatments: MD</p>                                                                                                                          |                                                                                                                                                                                                                               | <p>Target:</p> <p>HPV-6, -10, -11, -13, -26, -31, -32, -33, -34, -35, -39, -40, -42, -44, -45, -51, -52, -53, -54, -56, -58, -59, -61, -62, -66, -67, -68, -69, -70, -71, -72, -73, -76, -81, -82, -83, -84, -89 genome: n.538 of HR-HPV/ n.107 of LR-HPV</p> <p>HPV-16 genome: n.507</p> <p>HPV-18 genome: n.254</p> |                                                                                                                                                                       |                                                                                                                   |                                                                                        |
| <p>Shaikh, 2015</p> <p><i>Cancer Epidemiol</i></p> <p>Studies: n.1</p> <p>N/D n.1</p> <p>Meta-analysis</p> <p>Low quality</p> <p>This study was supported by the Griffith University of Australia.</p> | <p>Sample size: n.34 of case/n.396 of control</p> <p>Mean age: MD</p> <p>Gender ratio: MD</p> <p>Country: India n.34</p> <p>Risk factors for OSCC: MD</p> <p>History of OPMD: MD</p> <p>Time to OPMD onset: MD</p> <p>Previous history of malignancies: MD</p> <p>Other comorbidities: MD</p> <p>Other ongoing treatments: MD</p> | <p>Macroscopic features: MD</p> <p>Location: MD</p> <p>Staging: MD</p> <p>Grading: MD</p> <p>Microscopic features: MD</p> <p>First Diagnosis: MD</p> <p>Time to onset: MD</p> <p>Chemotherapy: MD</p> <p>Radiotherapy: MD</p> | <p>Sample(s): n.34</p> <p>Method(s) of sample collection: Saliva test</p> <p>Microorganisms identification technique: PCR n.34</p> <p>Target: HPV genome: n.34</p>                                                                                                                                                    | -                                                                                                                                                                     | <p>↑ HPV: n.24 (prevalence 70.60%) of OSCC case</p> <p>Genotype(s) of HPV detected: HPV-16: n.MD HPV-18: n.MD</p> | -                                                                                      |
| <p>Shen, 2023</p> <p><i>Arch Oral Biol</i></p> <p>Studies: n.5</p> <p>CCS n.5</p> <p>No Meta-analysis</p>                                                                                              | <p>Sample size: n.230 of case/n.219 of the healthy control group/n.205 of the OPMD control group</p> <p>Mean age: N/D</p> <p>Gender ratio: 27M/203MD</p> <p>Country: USA n.18 India n.31</p>                                                                                                                                      | <p>Macroscopic features: MD</p> <p>Location: MD</p> <p>Staging: MD</p> <p>Grading: MD</p> <p>Microscopic features: MD</p>                                                                                                     | <p>Sample(s): n.230</p> <p>Method(s) of sample collection: Saliva test n.152 Oral rinse n.49 Oral swab, plaque swab and saliva test n.29</p>                                                                                                                                                                          | <p>Than the healthy and the OPMD control group</p> <p>↑ Bacteroidetes:</p> <p>↑ Prevotella</p> <p>↑ Alloprevotella</p> <p>↑ Porphyromonas</p> <p>↑ Capnocytophaga</p> | -                                                                                                                 | <p>Than the healthy and the OPMD control group</p> <p>↑ Candida: n.29 of OSCC case</p> |



|                                                                                                                                                    |                                                                                                                                                                                                                                  |                                                                                            |                                                                                                                                                                                                                                                                                                                              |                                                                                                                                                                                                                                                                                                                                                                                                                                                                                                                                                                                                                                                                                                                                                       |                                                                                                                                           |
|----------------------------------------------------------------------------------------------------------------------------------------------------|----------------------------------------------------------------------------------------------------------------------------------------------------------------------------------------------------------------------------------|--------------------------------------------------------------------------------------------|------------------------------------------------------------------------------------------------------------------------------------------------------------------------------------------------------------------------------------------------------------------------------------------------------------------------------|-------------------------------------------------------------------------------------------------------------------------------------------------------------------------------------------------------------------------------------------------------------------------------------------------------------------------------------------------------------------------------------------------------------------------------------------------------------------------------------------------------------------------------------------------------------------------------------------------------------------------------------------------------------------------------------------------------------------------------------------------------|-------------------------------------------------------------------------------------------------------------------------------------------|
| <p>High quality</p> <p>This study was supported by the China-Japan Friendship Hospital Research Project Foundation [grant number 2020-1-QN-2].</p> | <p>Taiwan n.N/D<br/>China n.29+N/D</p> <p>Risk factors for OSCC: MD<br/>History of OPMD: MD<br/>Time to OPMD onset: MD<br/>Previous history of malignancies: MD<br/>Other comorbidities: MD<br/>Other ongoing treatments: MD</p> | <p>First Diagnosis: MD<br/>Time to onset: MD<br/>Chemotherapy: MD<br/>Radiotherapy: MD</p> | <p>Microorganisms identification technique: Modified QIAGEN DNA n.18<br/>Gene Fix Saliva Prep 2 Isolation kit n.31<br/>QIAamp DNA Blood mini kit n.124<br/>QIAamp DNA Mini kit n.21<br/>HiPure tissue and blood DNA kit n.32</p> <p>Target:<br/>16s rRNA: n.177<br/>V4 region n.124<br/>V3-V4 region n.103<br/>ITS1 n.32</p> | <p>Type(s) of Capnocytophaga species detected:<br/>↑ Capnocytophaga sputigena</p> <p>Fusobacteria:<br/>↑/↓ Fusobacterium</p> <p>↑/↓ Firmicutes:<br/>↓ Streptococcus<br/>↑/↓ Veillonella<br/>Catonella<br/>Type(s) of Catonella species detected:<br/>↑ Catonella morbi</p> <p>Proteobacteria:<br/>↑ Aggregatibacter<br/>↑ Neisseria</p> <p>Than the OPMD control group</p> <p>Bacteroidetes:<br/>↓ Prevotella<br/>Type(s) of Prevotella species detected:<br/>↓ Prevotella oulorum<br/>Tannerella<br/>Type(s) of Tannerella species detected:<br/>↓ Tannerella forsythia<br/>Porphyromonas<br/>Type(s) of Porphyromonas species detected:<br/>↓ Porphyromonas gingivalis</p> <p>Firmicutes:<br/>↓ Enterococcus<br/>↓ Megasphaera<br/>Anaeroglobus</p> | <p>↑ Aspergillus:<br/>MD n./% of OSCC case</p> <p>↑ Acremonium:<br/>MD n./% of OSCC case</p> <p>↓ Morchella:<br/>MD n./% of OSCC case</p> |
|----------------------------------------------------------------------------------------------------------------------------------------------------|----------------------------------------------------------------------------------------------------------------------------------------------------------------------------------------------------------------------------------|--------------------------------------------------------------------------------------------|------------------------------------------------------------------------------------------------------------------------------------------------------------------------------------------------------------------------------------------------------------------------------------------------------------------------------|-------------------------------------------------------------------------------------------------------------------------------------------------------------------------------------------------------------------------------------------------------------------------------------------------------------------------------------------------------------------------------------------------------------------------------------------------------------------------------------------------------------------------------------------------------------------------------------------------------------------------------------------------------------------------------------------------------------------------------------------------------|-------------------------------------------------------------------------------------------------------------------------------------------|

|                                                                                                                                                                                                      |                                                                                                                                                                                                                                                                                                                       |                                                                                                                                                                                                                               |                                                                                                                                                                                                                                                                        |                                                                                                                                                                                                                                                                                                                                                               |   |   |
|------------------------------------------------------------------------------------------------------------------------------------------------------------------------------------------------------|-----------------------------------------------------------------------------------------------------------------------------------------------------------------------------------------------------------------------------------------------------------------------------------------------------------------------|-------------------------------------------------------------------------------------------------------------------------------------------------------------------------------------------------------------------------------|------------------------------------------------------------------------------------------------------------------------------------------------------------------------------------------------------------------------------------------------------------------------|---------------------------------------------------------------------------------------------------------------------------------------------------------------------------------------------------------------------------------------------------------------------------------------------------------------------------------------------------------------|---|---|
|                                                                                                                                                                                                      |                                                                                                                                                                                                                                                                                                                       |                                                                                                                                                                                                                               |                                                                                                                                                                                                                                                                        | <p>Type(s) of Anaeroglobus species detected:<br/>↓ Anaeroglobus geminatus</p> <p>Proteobacteria:<br/>↓ Salmonella</p> <p>↓ Saccharibacteria</p> <p>Than the healthy control group</p> <p>Proteobacteria:<br/>↑ Escherichia</p> <p>Firmicutes:<br/>↑ Gemmiger<br/>↑ Oscillospira<br/>↑ Roseburia<br/>↑ Dialister</p> <p>Synergistota:<br/>↑ Cloacibacillus</p> |   |   |
| <p>Su Mun, 2021</p> <p><i>Int J Environ Res Public Health</i></p> <p>Studies: n.17<br/>CCS n.17</p> <p>No Meta-analysis</p> <p>High quality</p> <p>This study was supported by the International</p> | <p>Sample size: n.1089 of case/n.1091 of the healthy control group/n.12 of the control group with benign or malignant thyroid nodules</p> <p>Mean age: MD</p> <p>Gender ratio: MD</p> <p>Country:<br/>USA n.356<br/>Japan n.72<br/>India n.26<br/>Taiwan n.460<br/>Malaysia n.9<br/>China n.80<br/>Australia n.63</p> | <p>Macroscopic features: MD</p> <p>Location: MD</p> <p>Staging: MD</p> <p>Grading: MD</p> <p>Microscopic features: MD</p> <p>First Diagnosis: MD</p> <p>Time to onset: MD</p> <p>Chemotherapy: MD</p> <p>Radiotherapy: MD</p> | <p>Sample(s): n.1089</p> <p>Method(s) of sample collection:<br/>Saliva test n.387<br/>Oral swab n.139<br/>Oral rinse n.536<br/>Oral brush n.27</p> <p>Microorganisms identification technique:<br/>DNA Purification kit n.3<br/>DNA easy Blood and Tissue kit n.50</p> | <p>Than the healthy control group</p> <p>↑ Firmicutes:<br/>↑ Gemella<br/>↑/↓ Streptococcus</p> <p>Type(s) of Streptococcus species detected:<br/>↑ S. costellatus<br/>↑ S. anginosus<br/>↑ Peptostreptococcus</p> <p>Type(s) of Peptostreptococcus species detected:<br/>↑ Peptostreptococcus anaerobius<br/>↑ Gemmiger</p>                                   | - | - |

|                                 |                                                                                                                                                                                                                                 |  |                                                                                                                                                                                                                                                                                                                                                                                                                                                                                                                                                                                                                                                                                                                                                           |                                                                                                                                                                                                                                                                                                                                                                                                                                                                                                                                                                                                                                                                                                                                                                                                                                                                                                                                      |  |  |
|---------------------------------|---------------------------------------------------------------------------------------------------------------------------------------------------------------------------------------------------------------------------------|--|-----------------------------------------------------------------------------------------------------------------------------------------------------------------------------------------------------------------------------------------------------------------------------------------------------------------------------------------------------------------------------------------------------------------------------------------------------------------------------------------------------------------------------------------------------------------------------------------------------------------------------------------------------------------------------------------------------------------------------------------------------------|--------------------------------------------------------------------------------------------------------------------------------------------------------------------------------------------------------------------------------------------------------------------------------------------------------------------------------------------------------------------------------------------------------------------------------------------------------------------------------------------------------------------------------------------------------------------------------------------------------------------------------------------------------------------------------------------------------------------------------------------------------------------------------------------------------------------------------------------------------------------------------------------------------------------------------------|--|--|
| Medical University of Malaysia. | <p>New Zeland n.23</p> <p>Risk factors for OSCC: MD</p> <p>History of OPMD: MD</p> <p>Time to OPMD onset: MD</p> <p>Previous history of malignancies: MD</p> <p>Other comorbidities: MD</p> <p>Other ongoing treatments: MD</p> |  | <p>QIAAsymphony virus/Bacteria Midi kit n.121</p> <p>QIAamp DNA Blood Mini kit n.125</p> <p>EURx commercial kit with modifications n.9</p> <p>QIAamp DNA mini kit n.80</p> <p>PowerSoil DNA Isolation kit n.129</p> <p>QIAamp MinElute Virus Spin kit n.138</p> <p>Maxwell 16 LEV Blood DNA kit n.63</p> <p>Phenol-chloroform based DNA extraction n.23</p> <p>QIAamp DNA Microbiome kit n.197</p> <p>Modified QIAGEN DNA extraction n.26</p> <p>Gene Prep Star PI-80X device n.60</p> <p>QIAGEN DNeasy Blood and Tissue kit DNA n.26</p> <p>Purification kit n.27</p> <p>MD n.12</p> <p>Target:</p> <p>V4 region n.335</p> <p>V3-V4 region n.461</p> <p>V3-V5 region n.138</p> <p>V4-V5 region n.83</p> <p>V6-V8 region n.63</p> <p>V6-V9 region n.9</p> | <p>↑ Oscillospira</p> <p>↑ Roseburia</p> <p>↑ Granulicatella</p> <p>↑ Dialister</p> <p>↑/↓ Selenomonas</p> <p>Type(s) of Selenomonas species detected:</p> <p>↓ Selenomonas noxia</p> <p>↑/↓ Filifactor</p> <p>Type(s) of Filifactor species detected:</p> <p>↑ Filifactor alocis</p> <p>↑ Peptococcus</p> <p>↑ Catonella</p> <p>↑/↓ Oribacterium</p> <p>↑/↓ Parvimonas</p> <p>Type(s) of Parvimonas species detected:</p> <p>↑/↓ Parvimonas micra</p> <p>↑ Centipeda</p> <p>Ruminococcus</p> <p>Type(s) of Ruminococcus species detected:</p> <p>↓ Ruminococcus gnavus</p> <p>↑/↓ Lactobacillus</p> <p>Type(s) of Lactobacillus species detected:</p> <p>↓ Lactobacillus plantarum</p> <p>↑/↓ Veillonella</p> <p>Type(s) of Veillonella species detected:</p> <p>↑ Veillonella parvula</p> <p>↑/↓ Veillonella dispar</p> <p>↓ Stomatobaculum</p> <p>↓ Megasphaera</p> <p>↓ Dorea</p> <p>↑ Bacteroidetes:</p> <p>↑/↓ Bacteroides</p> |  |  |
|---------------------------------|---------------------------------------------------------------------------------------------------------------------------------------------------------------------------------------------------------------------------------|--|-----------------------------------------------------------------------------------------------------------------------------------------------------------------------------------------------------------------------------------------------------------------------------------------------------------------------------------------------------------------------------------------------------------------------------------------------------------------------------------------------------------------------------------------------------------------------------------------------------------------------------------------------------------------------------------------------------------------------------------------------------------|--------------------------------------------------------------------------------------------------------------------------------------------------------------------------------------------------------------------------------------------------------------------------------------------------------------------------------------------------------------------------------------------------------------------------------------------------------------------------------------------------------------------------------------------------------------------------------------------------------------------------------------------------------------------------------------------------------------------------------------------------------------------------------------------------------------------------------------------------------------------------------------------------------------------------------------|--|--|

|  |  |  |  |                                                                                                                                                                                                                                                                                                                                                                                                                                                                                                                                                                                                                                                                                                                                                                                                                                                                                                                                                                                                                                                               |  |  |
|--|--|--|--|---------------------------------------------------------------------------------------------------------------------------------------------------------------------------------------------------------------------------------------------------------------------------------------------------------------------------------------------------------------------------------------------------------------------------------------------------------------------------------------------------------------------------------------------------------------------------------------------------------------------------------------------------------------------------------------------------------------------------------------------------------------------------------------------------------------------------------------------------------------------------------------------------------------------------------------------------------------------------------------------------------------------------------------------------------------|--|--|
|  |  |  |  | <p>Type(s) of Bacteroides species detected:</p> <p>↓ Bacteroides ovatus</p> <p>↑/↓ Porphyromonas</p> <p>Type(s) of Porphyromonas species detected:</p> <p>↑ Porphyromonas pasteri</p> <p>↑ Porphyromonas gingivalis</p> <p>↑ Porphyromonas endodontalis</p> <p>↑ Alloprevotella</p> <p>↑/↓ Prevotella</p> <p>Type(s) of Prevotella species detected:</p> <p>↑ Prevotella tanneriae</p> <p>↑ Prevotella intermedia</p> <p>↑ Prevotella melaninogenica</p> <p>↑ Prevotella pallens</p> <p>↑ Prevotella copri</p> <p>↑ / ↓ Prevotella nigrescens</p> <p>↑ / ↓ Prevotella nanceiensis</p> <p>↓ Tannerella</p> <p>↑ / ↓ Capnocytophaga</p> <p>Type(s) of Capnocytophaga species detected:</p> <p>↓ Capnocytophaga ochracea</p> <p>↓ Paludibacter</p> <p>Parabacteroides</p> <p>Type(s) of Parabacteroides species detected:</p> <p>↓ Parabacteroides distasonis</p> <p>Proteobacteria:</p> <p>↑ Escherichia</p> <p>↑ Campylobacter</p> <p>Types(s) of Campylobacter species detected:</p> <p>↑ Campylobacter ureolyticus</p> <p>↑ Eikenella</p> <p>↓ Lautropia</p> |  |  |
|--|--|--|--|---------------------------------------------------------------------------------------------------------------------------------------------------------------------------------------------------------------------------------------------------------------------------------------------------------------------------------------------------------------------------------------------------------------------------------------------------------------------------------------------------------------------------------------------------------------------------------------------------------------------------------------------------------------------------------------------------------------------------------------------------------------------------------------------------------------------------------------------------------------------------------------------------------------------------------------------------------------------------------------------------------------------------------------------------------------|--|--|

|  |  |  |  |                                                                                                                                                                                                                                                                                                                                                                                                                                                                                                                                                                                                                                                                                                                                                                                                                                                                                                               |  |  |
|--|--|--|--|---------------------------------------------------------------------------------------------------------------------------------------------------------------------------------------------------------------------------------------------------------------------------------------------------------------------------------------------------------------------------------------------------------------------------------------------------------------------------------------------------------------------------------------------------------------------------------------------------------------------------------------------------------------------------------------------------------------------------------------------------------------------------------------------------------------------------------------------------------------------------------------------------------------|--|--|
|  |  |  |  | <p>↓ Actinobacillus<br/> ↑/↓ Neisseria<br/> Type(s) of Neisseria species detected:<br/> ↓ Neisseria subflava<br/> ↑/↓ Neisseria bacilliformis<br/> ↑/↓ Haemophilus<br/> Type(s) of Haemophilus species detected:<br/> ↑ Haemophilus influenzae<br/> ↑ Haemophilus parainfluenzae<br/> ↓ Kingella<br/> Stenotrophomonas<br/> Types(s) of Stenotrophomonas species detected:<br/> ↓ Stenotrophomonas ruminococcus<br/> Aggregatibacter<br/> Type(s) of Aggregatibacter species detected:<br/> ↓ Aggregatibacter segnis</p> <p>Synergistota:<br/> ↑ Cloacibacillus</p> <p>↓ Actinobacteria:<br/> ↑/↓ Rothia<br/> Type(s) of Rothia species detected:<br/> ↓ Rothia mucilaginosa<br/> ↓ Rothia aeria<br/> ↓ Rothia dentocariosa<br/> ↓ Scardovia<br/> ↑/↓ Actinomyces<br/> Type(s) of Actinomyces species detected:<br/> ↑ Actinomyces odontolyticus<br/> ↓ Actinomyces oral taxon_170</p> <p>↑ Fusobacteria:</p> |  |  |
|--|--|--|--|---------------------------------------------------------------------------------------------------------------------------------------------------------------------------------------------------------------------------------------------------------------------------------------------------------------------------------------------------------------------------------------------------------------------------------------------------------------------------------------------------------------------------------------------------------------------------------------------------------------------------------------------------------------------------------------------------------------------------------------------------------------------------------------------------------------------------------------------------------------------------------------------------------------|--|--|

|                                                                                                                                                                                                                 |                                                                                                                                                                                                                                                                                                                                |                                                                                                                                                                                                |                                                                                                                                                                                                                                                                                                                            |                                                                                                                                                                                                                                                                                                                                                                                                                             |   |   |
|-----------------------------------------------------------------------------------------------------------------------------------------------------------------------------------------------------------------|--------------------------------------------------------------------------------------------------------------------------------------------------------------------------------------------------------------------------------------------------------------------------------------------------------------------------------|------------------------------------------------------------------------------------------------------------------------------------------------------------------------------------------------|----------------------------------------------------------------------------------------------------------------------------------------------------------------------------------------------------------------------------------------------------------------------------------------------------------------------------|-----------------------------------------------------------------------------------------------------------------------------------------------------------------------------------------------------------------------------------------------------------------------------------------------------------------------------------------------------------------------------------------------------------------------------|---|---|
|                                                                                                                                                                                                                 |                                                                                                                                                                                                                                                                                                                                |                                                                                                                                                                                                |                                                                                                                                                                                                                                                                                                                            | ↑/↓ Fusobacterium<br>Type(s) of Fusobacterium species detected:<br>↑ F. nucleatum<br>↑ F. periodonticum<br>↓ Leptotrichia<br><br>↑ Spirochaetes:<br>↑ Treponema<br><br>Tenericutes:<br>↑ Mycoplasma                                                                                                                                                                                                                         |   |   |
| Yu, 2023<br><br><i>Heliyon</i><br><br>Studies: n.7<br>CCS n.7<br><br>Meta-Analysis<br><br>Moderate quality<br><br>This study was supported by Grant from Qingdao Medical Talents Training Program [VYQ2020Y02]. | Sample size: n.413 of case/n.300 of the healthy control group<br>Mean age: 54.5 y.o.; range 32-87 y.o.<br>Gender ratio: MD<br>Country: MD<br><br>Risk factors for OSCC: MD<br>History of OPMD: MD<br>Time to OPMD onset: MD<br>Previous history of malignancies: MD<br>Other comorbidities: MD<br>Other ongoing treatments: MD | Macroscopic features: MD<br>Location: MD<br><br>Staging: MD<br>Grading: MD<br>Microscopic features: MD<br><br>First Diagnosis: MD<br>Time to onset: MD<br>Chemotherapy: MD<br>Radiotherapy: MD | Sample(s): n.413<br><br>Method(s) of sample collection:<br>Saliva test n.188<br>Oral rinse n.225<br><br>Microorganisms identification technique:<br>N/D next-generation sequencing technology n.413<br><br>Target:<br>V4 region n.131<br>V3-V4 region n.215<br>V3-V5 region n.10<br>V4-V5 region n.47<br>V6-V8 region n.10 | Than the healthy control group<br><br>↑ Fusobacteria:<br>↑ Fusobacterium<br>p=0.000<br><br>↑/↓ Proteobacteria:<br>↑/↓ Haemophilus<br>p= 0.000<br>↑ Escherichia<br>↓ Neisseria<br><br>↑/↓ Actinobacteria:<br>↓ Rothia<br><br>↑/↓ Firmicutes:<br>↑/↓ Streptococcus<br>p= 0.032<br>↑/↓ Veillonella<br>↑ Lactobacillus<br>↑ Blautia<br>↑ Clostridium<br>↑ Dorea<br>↑ Faecalibacterium<br>↑ Megamonas<br>↑ Phascolarctobacterium | - | - |

|  |  |  |                                                                                                                   |  |  |
|--|--|--|-------------------------------------------------------------------------------------------------------------------|--|--|
|  |  |  | ↑/↓ Bacteroidetes: 50.0% of<br>OSCC case<br>↑ Prevotella: NSS<br>↑ Alloprevotella<br>↑ Alistipes<br>↑ Bacteroides |  |  |
|--|--|--|-------------------------------------------------------------------------------------------------------------------|--|--|

Abbreviations: number, "n."; years old, "y.o."; percentage, "%"; greater than, ">"; less than, "<"; missing data, "MD"; not defined, "N/D"; not statistically significant, "NSS"; not significant, "NS"; p-value, "p"; male, "M"; female, "F"; case-control study, "CCS"; cohort study, "CS"; cross-sectional study, "CSS"; cross-sectional cohort study, "CSCS"; Oral Squamous Cell Carcinoma, "OSCC"; Oral Potentially Malignant Disorder, "OPMD"; United States of America, "USA"; polymerase chain reaction, "PCR"; real time polymerase chain reaction, "RT-PCR"; quantitative polymerase chain reaction, "qPCR"; immunohistochemistry, "IHC"; Ribosomal Ribonucleic Acid, "rRNA"; RiboNucleic Acid, "RNA"; DeoxyriboNucleic Acid, "DNA"; subspecies, "ssp"; Fusobacterium, "F."; Campylobacter, "C."; Streptococcus, "S."; Human Papilloma Virus, "HPV"; Low Risk Human Papilloma Virus, "LR-HPV"; High Risk Human Papilloma Virus, "HR-HPV"; Epstein Barr Virus, "EBV"; increased, "↑"; decreased, "↓"; not investigated, "-".
